# Supplementary material for: Methane exchange at the peatland forest floor – automatic chamber system exposes the dynamics of small fluxes
Source: Copernicus journal article supplement (doi:10.5194/bg-14-1947-2017), 2017-04-10
Supplement: Supplementary file 1 [file bg-14-1947-2017-supplement.zip]

Archive with 3 entries (3 files):
- Supplement.pdf
- Lettosuo_chamber_methane_fluxes_2011-2013.csv
- bg-14-1947-2017-supplement-title-page.pdf
