# Supplementary material for: Methane exchange at the peatland forest floor – automatic chamber system exposes the dynamics of small fluxes
Source: Copernicus journal article supplement (doi:10.5194/bg-14-1947-2017), 2017-04-10
Supplement: Supplementary file 1 [file bg-14-1947-2017-supplement.zip › bg-14-1947-2017-supplement-title-page.pdf]

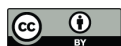

## *Supplement of*

# **Methane exchange at the peatland forest floor – automatic chamber system exposes the dynamics of small fluxes**

**Mika Korkiakoski et al.**

*Correspondence to:* Mika Korkiakoski (mika.korkiakoski@fmi.fi)

- bg-14-1947-2017-supplement-title-page.pdf
- Lettosuo\_chamber\_methane\_fluxes\_2011-2013.csv
- Supplement.pdf

The copyright of individual parts of the supplement might differ from the CC-BY 3.0 licence.
