# Supplementary material for: Methane exchange at the peatland forest floor – automatic chamber system exposes the dynamics of small fluxes
Source: Copernicus journal article supplement (doi:10.5194/bg-14-1947-2017), 2017-04-10
Supplement: Supplementary file 1 [file bg-14-1947-2017-supplement.zip › Lettosuo_chamber_methane_fluxes_2011-2013.csv]

datetime	source	flux_ch4 [ug ch4 m-2 h-1]	T_headspace [C]
2011-04-01 00:59:12.200	Chamber.6	-4.19528957654	-8.37194166667
2011-04-01 01:52:11.100	Chamber.5	-25.2112902579	-8.86253055556
2011-04-01 01:59:12.600	Chamber.6	-15.1751281326	-8.72186944444
2011-04-01 02:45:11.300	Chamber.3	8.67099320056	-8.29326388889
2011-04-01 02:52:14.200	Chamber.5	-4.48955060933	-8.85204444444
2011-04-01 02:59:22.400	Chamber.6	-13.5400868851	-8.64598888889
2011-04-01 03:45:28.800	Chamber.3	-19.1288504124	-8.06498333333
2011-04-01 03:52:23.800	Chamber.5	-7.228791144	-8.5669027027
2011-04-01 03:59:28.700	Chamber.6	-4.03816325707	-8.45417222222
2011-04-01 04:31:19.700	Chamber.1	4.70535274529	-8.49014444444
2011-04-01 04:38:27.500	Chamber.2	1.39909973438	-8.23661891892
2011-04-01 04:45:29.400	Chamber.3	-10.4261687819	-7.74841666667
2011-04-01 04:52:32.800	Chamber.5	-12.1551910053	-8.074625
2011-04-01 05:38:21.000	Chamber.2	-1.62990056067	-7.85446111111
2011-04-01 05:52:12.600	Chamber.5	-9.61760368029	-7.87930833333
2011-04-01 05:59:22.700	Chamber.6	-0.81891037447	-7.81469722222
2011-04-01 06:45:10.200	Chamber.3	-7.96819158137	-5.94136388889
2011-04-01 06:52:12.800	Chamber.5	-2.17746623555	-5.65446944444
2011-04-01 06:59:22.300	Chamber.6	0.383038216985	-5.1150972973
2011-04-01 07:31:02.300	Chamber.1	-0.202258602878	-4.17197777778
2011-04-01 07:38:13.400	Chamber.2	-0.31993223816	-3.88637222222
2011-04-01 07:52:12.700	Chamber.5	-7.73568053282	-3.89625
2011-04-01 07:59:12.100	Chamber.6	-6.17460345994	-3.81087222222
2011-04-01 08:38:10.700	Chamber.2	-1.89870742002	-2.4242
2011-04-01 08:45:14.400	Chamber.3	-12.1017639017	-2.53337297297
2011-04-01 08:52:12.700	Chamber.5	-8.2775631324	-2.30307777778
2011-04-01 08:59:12.900	Chamber.6	-2.25944994437	-1.94090833333
2011-04-01 09:31:00.900	Chamber.1	0.105599811418	-1.58148611111
2011-04-01 09:38:12.000	Chamber.2	-1.3953338382	-1.43118378378
2011-04-01 09:45:13.000	Chamber.3	-14.5397646148	-1.71968888889
2011-04-01 09:52:11.200	Chamber.5	-12.7692654609	-1.41314722222
2011-04-01 09:59:11.100	Chamber.6	-3.63551120419	-1.06733361111
2011-04-01 10:31:11.100	Chamber.1	0.760908809575	-0.593688611111
2011-04-01 10:45:12.500	Chamber.3	-12.3398742299	-1.0167
2011-04-01 10:52:13.100	Chamber.5	-11.2362707471	-0.913044444444
2011-04-01 10:59:13.600	Chamber.6	-4.93574469909	-0.513951944444
2011-04-01 11:38:10.500	Chamber.2	-5.19939346665	0.0956233333333
2011-04-01 11:52:11.800	Chamber.5	-8.80312504206	-0.217673888889
2011-04-01 11:59:11.400	Chamber.6	-5.68627291407	0.182921944444
2011-04-01 12:38:11.100	Chamber.2	-1.32581621676	0.796366111111
2011-04-01 12:52:13.500	Chamber.5	-7.8712092147	0.381582222222
2011-04-01 12:59:13.100	Chamber.6	-8.81025924072	0.779408888889
2011-04-01 13:31:01.100	Chamber.1	-1.96901751818	0.61092
2011-04-01 13:45:12.300	Chamber.3	-18.34743675	0.369134054054
2011-04-01 13:52:10.700	Chamber.5	-11.9466957769	0.543426666667
2011-04-01 13:59:10.000	Chamber.6	-4.9033053542	0.888381111111
2011-04-01 14:38:13.200	Chamber.2	-13.3319609711	0.487135135135
2011-04-01 14:45:13.000	Chamber.3	-14.9546915492	0.0625880555556
2011-04-01 14:52:10.500	Chamber.5	-6.86078234923	-0.0247052777778
2011-04-01 14:59:12.300	Chamber.6	-3.23252206447	0.0177502777778
2011-04-01 15:31:02.500	Chamber.1	-1.72206344953	-0.325707222222
2011-04-01 15:38:12.000	Chamber.2	-1.72439085471	-0.432855405405
2011-04-01 15:52:09.600	Chamber.5	-7.06715806743	-0.434221944444
2011-04-01 15:59:12.500	Chamber.6	-8.263763587	-0.247400277778
2011-04-01 16:31:00.500	Chamber.1	-2.01731271575	-0.326178055556
2011-04-01 16:38:10.800	Chamber.2	-1.4854688708	-0.37902
2011-04-01 16:52:11.800	Chamber.5	-13.5753791196	-0.572923611111
2011-04-01 16:59:11.200	Chamber.6	-2.48139086351	-0.409688611111
2011-04-01 17:38:09.800	Chamber.2	-1.7227464333	-0.533381621622
2011-04-01 17:52:11.700	Chamber.5	-7.71003480294	-0.537552222222
2011-04-01 17:59:11.500	Chamber.6	-5.68553818742	-0.353550833333
2011-04-01 18:38:11.300	Chamber.2	-2.0773537402	-0.496498333333
2011-04-01 18:45:10.200	Chamber.3	-10.213383364	-0.801914864865
2011-04-01 18:52:13.800	Chamber.5	-5.21005525972	-0.730505277778
2011-04-01 18:59:12.000	Chamber.6	-8.03163755443	-0.544163055556
2011-04-01 19:38:09.700	Chamber.2	-3.86085065375	-0.747776216216
2011-04-01 19:45:13.600	Chamber.3	-15.1600376414	-1.01024111111
2011-04-01 19:52:13.700	Chamber.5	-14.5193324775	-0.915906111111
2011-04-01 19:59:11.200	Chamber.6	-5.46917978043	-0.5927725
2011-04-01 20:38:13.000	Chamber.2	-2.10204162985	-0.58253
2011-04-01 20:52:10.800	Chamber.5	-11.7939885344	-0.813078055556
2011-04-01 20:59:13.900	Chamber.6	-5.03298458201	-0.481908055556
2011-04-01 21:45:10.300	Chamber.3	-17.0768903473	-0.82119
2011-04-01 21:52:12.800	Chamber.5	-11.3847393875	-0.869654444444
2011-04-01 21:59:10.700	Chamber.6	-12.9337799878	-0.5304725
2011-04-01 22:52:11.200	Chamber.5	-19.2440644249	-0.868233055556
2011-04-01 22:59:10.700	Chamber.6	-9.18285076015	-0.549343888889
2011-04-01 23:45:12.200	Chamber.3	-14.5558000513	-0.743614594595
2011-04-01 23:52:10.600	Chamber.5	-12.7403689117	-0.815893055556
2011-04-02 00:52:12.700	Chamber.5	-8.04095848455	-0.916853055556
2011-04-02 01:45:12.700	Chamber.3	-28.8623457372	-0.903787837838
2011-04-02 01:52:10.000	Chamber.5	-12.9561941361	-0.970120555556
2011-04-02 01:59:10.300	Chamber.6	-13.4254824735	-0.742276666667
2011-04-02 02:52:09.600	Chamber.5	-3.26448230887	-1.32815
2011-04-02 02:59:10.300	Chamber.6	-37.5576523254	-1.33568888889
2011-04-02 03:45:13.200	Chamber.3	-18.5649837903	-1.25886111111
2011-04-02 03:52:10.300	Chamber.5	-4.9334273608	-1.30319444444
2011-04-02 03:59:12.100	Chamber.6	-3.48062707481	-1.04704055556
2011-04-02 04:31:01.400	Chamber.1	-0.502075622705	-0.991841388889
2011-04-02 04:38:11.000	Chamber.2	-1.37863488151	-0.98963027027
2011-04-02 04:52:11.900	Chamber.5	-13.6331526277	-1.08335833333
2011-04-02 04:59:10.100	Chamber.6	-7.82904548338	-0.853611388889
2011-04-02 05:31:00.500	Chamber.1	-17.3509011284	-0.900354166667
2011-04-02 05:38:13.100	Chamber.2	-12.6328790475	-0.901074054054
2011-04-02 05:52:11.400	Chamber.5	-9.56168562719	-0.985714166667
2011-04-02 05:59:12.600	Chamber.6	-5.6297659794	-0.764473055556
2011-04-02 06:45:11.600	Chamber.3	-19.4234513305	-0.609626486486
2011-04-02 06:52:12.500	Chamber.5	-4.90598903333	-0.598445555556
2011-04-02 07:52:11.500	Chamber.5	-16.9747834825	-0.171917777778
2011-04-02 08:52:13.200	Chamber.5	-13.1169610711	0.0149513888889
2011-04-02 08:59:10.000	Chamber.6	-14.1737400719	0.258899722222
2011-04-02 09:52:13.800	Chamber.5	-14.4565149361	0.398105277778
2011-04-02 09:59:11.800	Chamber.6	-18.7112983031	0.685993611111
2011-04-02 10:38:13.600	Chamber.2	-13.1812355868	1.12159916667
2011-04-02 10:45:10.200	Chamber.3	-18.8326280254	0.851747837838
2011-04-02 10:52:10.000	Chamber.5	-15.888612087	0.893606944444
2011-04-02 10:59:13.000	Chamber.6	-11.7658822889	1.41422222222
2011-04-02 11:45:12.200	Chamber.3	-20.5690691289	1.06710540541
2011-04-02 11:52:12.300	Chamber.5	-11.1190312499	1.33207333333
2011-04-02 11:59:10.600	Chamber.6	-14.308943962	1.68375222222
2011-04-02 12:52:09.700	Chamber.5	-10.0393324685	1.52559527778
2011-04-02 12:59:10.200	Chamber.6	-6.38659674637	1.8380925
2011-04-02 13:38:12.600	Chamber.2	-2.14799763686	2.02874810811
2011-04-02 13:52:13.400	Chamber.5	-7.96612507419	1.6180525
2011-04-02 13:59:12.400	Chamber.6	-8.65096615743	2.04857527778
2011-04-02 14:38:10.400	Chamber.2	-2.67561737978	1.78713297297
2011-04-02 14:52:11.400	Chamber.5	-11.3297626661	1.30653694444
2011-04-02 14:59:13.700	Chamber.6	-10.6643965756	1.68041444444
2011-04-02 15:38:12.300	Chamber.2	-4.23015671653	1.60755189189
2011-04-02 15:52:12.500	Chamber.5	-14.2851387008	1.46560805556
2011-04-02 16:38:10.900	Chamber.2	-0.607405850375	1.46323694444
2011-04-02 16:52:13.100	Chamber.5	-5.45127599291	1.32451888889
2011-04-02 17:31:01.500	Chamber.1	0.78979176787	1.06256
2011-04-02 17:38:13.500	Chamber.2	-6.37517353858	0.949502702703
2011-04-02 17:52:10.200	Chamber.5	-6.86984085125	0.813382777778
2011-04-02 17:59:12.000	Chamber.6	-4.00094834683	0.987043055556
2011-04-02 18:38:11.300	Chamber.2	-1.49000165839	0.663769444444
2011-04-02 18:52:13.300	Chamber.5	-10.7092887607	0.44953
2011-04-02 18:59:09.800	Chamber.6	-6.87424988162	0.650079722222
2011-04-02 19:38:11.600	Chamber.2	-7.55939760295	0.460059189189
2011-04-02 19:52:12.600	Chamber.5	-8.63791706416	0.362209722222
2011-04-02 20:38:10.100	Chamber.2	-4.07203387689	0.330600277778
2011-04-02 20:52:10.800	Chamber.5	-10.6385311588	0.233866388889
2011-04-02 21:38:13.200	Chamber.2	-4.88195834399	0.230088055556
2011-04-02 21:52:13.100	Chamber.5	-11.8496532703	0.117800555556
2011-04-02 22:38:12.000	Chamber.2	-7.83322574397	0.119852702703
2011-04-02 22:52:10.700	Chamber.5	-5.98846396614	0.0347488888889
2011-04-02 23:38:12.700	Chamber.2	-7.45332823958	0.120772702703
2011-04-02 23:52:10.200	Chamber.5	-10.3527054491	0.158849166667
2011-04-03 00:38:13.600	Chamber.2	-4.18293032067	0.2429
2011-04-03 00:52:11.400	Chamber.5	-7.61639323703	0.309375277778
2011-04-03 01:38:13.400	Chamber.2	-4.74164992407	0.430223243243
2011-04-03 01:52:10.600	Chamber.5	-38.4555756844	0.379219444444
2011-04-03 02:38:12.100	Chamber.2	-3.52694393681	0.477399166667
2011-04-03 02:52:12.100	Chamber.5	-6.20832267001	0.308447777778
2011-04-03 03:38:11.900	Chamber.2	-7.52803978098	0.460395833333
2011-04-03 03:52:13.500	Chamber.5	-4.3180632955	0.461340277778
2011-04-03 03:59:10.400	Chamber.6	-9.22389270836	0.574596111111
2011-04-03 04:38:10.900	Chamber.2	-10.4489758921	0.561848055556
2011-04-03 04:52:12.400	Chamber.5	-7.42595557551	0.405657777778
2011-04-03 05:38:11.700	Chamber.2	-8.90932722761	0.502395
2011-04-03 05:52:12.800	Chamber.5	-10.0716769512	0.478328888889
2011-04-03 06:38:11.300	Chamber.2	-3.5979197865	0.680298055556
2011-04-03 06:52:10.600	Chamber.5	-5.44417304271	0.574605555556
2011-04-03 06:59:10.200	Chamber.6	-2.21570150519	0.8020925
2011-04-03 07:38:12.200	Chamber.2	-2.27309023148	0.978460810811
2011-04-03 07:52:11.700	Chamber.5	-6.01294006461	0.855846388889
2011-04-03 07:59:12.000	Chamber.6	-6.53802237439	1.31464916667
2011-04-03 08:38:12.300	Chamber.2	-5.14502763021	1.26887138889
2011-04-03 08:52:10.800	Chamber.5	-7.20780742464	1.22682222222
2011-04-03 08:59:10.700	Chamber.6	-5.33073467543	1.45529083333
2011-04-03 09:31:01.700	Chamber.1	-4.21169090636	1.35993305556
2011-04-03 09:38:10.900	Chamber.2	-2.84821984863	1.26455189189
2011-04-03 09:52:12.500	Chamber.5	-69.9135581397	1.2296375
2011-04-03 10:31:01.300	Chamber.1	-5.0424264534	1.34058027778
2011-04-03 10:38:12.000	Chamber.2	-3.76558550341	1.31046810811
2011-04-03 10:52:12.100	Chamber.5	-7.22280465746	1.30186
2011-04-03 10:59:11.100	Chamber.6	-6.18732615112	1.73329805556
2011-04-03 11:31:01.800	Chamber.1	-7.39151058286	1.54402194444
2011-04-03 11:38:11.700	Chamber.2	-5.43338837695	1.46707108108
2011-04-03 11:52:12.900	Chamber.5	-6.01347095019	1.19044861111
2011-04-03 11:59:10.600	Chamber.6	-2.11100160078	1.64124805556
2011-04-03 12:31:01.300	Chamber.1	-19.1288639301	1.42969861111
2011-04-03 12:38:12.700	Chamber.2	-1.53020843853	1.47254945946
2011-04-03 12:52:11.600	Chamber.5	-10.574897043	1.20551388889
2011-04-03 12:59:10.600	Chamber.6	-6.75957066231	1.501985
2011-04-03 13:31:02.600	Chamber.1	-7.83608186776	1.33865611111
2011-04-03 13:38:12.700	Chamber.2	-3.91431161072	1.41009891892
2011-04-03 13:52:10.900	Chamber.5	-5.79436712488	1.15176444444
2011-04-03 13:59:09.500	Chamber.6	-14.3762243418	1.39152861111
2011-04-03 14:31:01.500	Chamber.1	-2.15248401629	1.32829222222
2011-04-03 14:38:11.700	Chamber.2	-13.6906028688	1.33586583333
2011-04-03 14:52:12.800	Chamber.5	-3.53413704018	1.20394459459
2011-04-03 14:59:11.200	Chamber.6	-4.67955639427	1.47321777778
2011-04-03 15:31:02.000	Chamber.1	-5.58808798597	1.17679444444
2011-04-03 15:38:10.600	Chamber.2	-15.6374448142	1.25608333333
2011-04-03 15:52:11.600	Chamber.5	-5.4158684948	0.794953611111
2011-04-03 15:59:09.900	Chamber.6	-8.50455947375	1.17394805556
2011-04-03 16:31:01.300	Chamber.1	-7.69949220013	1.00639333333
2011-04-03 16:38:12.600	Chamber.2	-9.17180812116	0.995944594595
2011-04-03 16:52:09.900	Chamber.5	-9.31420121406	0.811498888889
2011-04-03 16:59:12.600	Chamber.6	-8.98873934394	0.970553333333
2011-04-03 17:30:59.700	Chamber.1	-2.78187878052	0.990852222222
2011-04-03 17:38:09.600	Chamber.2	-6.15951707157	0.939907777778
2011-04-03 17:52:10.700	Chamber.5	-3.97312622513	0.821901111111
2011-04-03 17:59:13.500	Chamber.6	-6.06271369591	1.40057527778
2011-04-03 18:31:00.300	Chamber.1	-5.62126342818	1.18345388889
2011-04-03 18:38:11.800	Chamber.2	-4.87384214202	0.984950810811
2011-04-03 18:52:12.000	Chamber.5	-4.82772335974	0.728954722222
2011-04-03 18:59:11.500	Chamber.6	-11.8105378446	0.985700833333
2011-04-03 19:31:01.700	Chamber.1	-5.09356582134	0.639283611111
2011-04-03 19:38:10.300	Chamber.2	-3.12889902963	0.636873783784
2011-04-03 19:52:11.900	Chamber.5	-9.03769176571	0.534977222222
2011-04-03 19:59:10.700	Chamber.6	-17.0669621255	0.764820833333
2011-04-03 20:31:00.600	Chamber.1	-5.3202196334	0.627961388889
2011-04-03 20:38:09.600	Chamber.2	-9.25472404341	0.822868055556
2011-04-03 20:52:11.600	Chamber.5	-13.6863332055	0.8304125
2011-04-03 20:59:10.100	Chamber.6	-15.5266607001	0.872885833333
2011-04-03 21:31:02.200	Chamber.1	-2.37894610989	0.701545555556
2011-04-03 21:38:10.700	Chamber.2	-0.354947449281	0.69607027027
2011-04-03 21:52:11.800	Chamber.5	-9.14678697875	0.561868611111
2011-04-03 21:59:10.700	Chamber.6	-11.9397126798	0.827091944444
2011-04-03 22:31:03.100	Chamber.1	-2.05407684446	0.766203333333
2011-04-03 22:38:10.800	Chamber.2	-6.30821993813	0.905913888889
2011-04-03 22:52:13.300	Chamber.5	-4.0996187073	0.657195833333
2011-04-03 22:59:12.400	Chamber.6	-14.6097603773	0.958756388889
2011-04-03 23:31:00.400	Chamber.1	-3.01026953977	1.31794888889
2011-04-03 23:38:12.200	Chamber.2	-4.35420339599	1.28774333333
2011-04-03 23:52:13.600	Chamber.5	-8.60698543669	1.05410805556
2011-04-04 00:31:01.600	Chamber.1	1.17229779503e-13	0.997435277778
2011-04-04 00:38:12.800	Chamber.2	-4.56683643702	1.06893810811
2011-04-04 00:52:11.700	Chamber.5	-6.75659051303	0.770434166667
2011-04-04 00:59:10.800	Chamber.6	-19.1286488445	1.00358416667
2011-04-04 01:31:01.500	Chamber.1	-5.8129925184	0.994157222222
2011-04-04 01:38:12.600	Chamber.2	-4.78880480393	1.12914567568
2011-04-04 01:52:11.000	Chamber.5	-9.01282628029	0.746376666667
2011-04-04 01:59:13.100	Chamber.6	-12.3515848656	1.11449555556
2011-04-04 02:31:00.200	Chamber.1	-4.79275779456	0.764763888889
2011-04-04 02:38:10.300	Chamber.2	-10.7352923515	0.724656944444
2011-04-04 02:52:09.700	Chamber.5	-5.71226218547	0.493416666667
2011-04-04 02:59:11.900	Chamber.6	-15.9756024875	0.801123055556
2011-04-04 03:31:00.400	Chamber.1	-7.00725392737	0.587829444444
2011-04-04 03:38:12.200	Chamber.2	-7.57228179189	0.6269975
2011-04-04 03:52:11.900	Chamber.5	-12.4960528917	0.494396111111
2011-04-04 03:59:11.200	Chamber.6	-14.511292946	0.740278888889
2011-04-04 04:31:03.100	Chamber.1	-1.56365687415	0.708182222222
2011-04-04 04:38:13.400	Chamber.2	-7.88110302654	0.667124444444
2011-04-04 04:52:12.300	Chamber.5	-10.4796077685	0.5736725
2011-04-04 04:59:11.200	Chamber.6	-12.766005886	0.803519166667
2011-04-04 05:31:02.700	Chamber.1	-14.3794654017	0.718560555556
2011-04-04 05:38:12.600	Chamber.2	-9.88153526443	0.657088648649
2011-04-04 05:52:10.700	Chamber.5	-15.5407983853	0.634579444444
2011-04-04 05:59:12.400	Chamber.6	-7.87349033699	0.885184444444
2011-04-04 06:31:01.600	Chamber.1	-6.67408991071	0.849775555556
2011-04-04 06:38:12.900	Chamber.2	-6.99983136537	0.742498108108
2011-04-04 06:52:11.700	Chamber.5	-17.1716801467	0.6435425
2011-04-04 06:59:10.000	Chamber.6	-19.6725940844	0.957843611111
2011-04-04 07:31:03.600	Chamber.1	-2.29661103334	0.868193055556
2011-04-04 07:38:11.500	Chamber.2	-2.42024399746	0.901233888889
2011-04-04 07:52:12.900	Chamber.5	-5.78939417378	0.66855
2011-04-04 07:59:20.100	Chamber.6	-11.3131360361	0.935806486486
2011-04-04 08:31:01.100	Chamber.1	-6.59657620395	1.14429194444
2011-04-04 08:38:12.500	Chamber.2	-18.2645100477	1.16314405405
2011-04-04 08:52:21.400	Chamber.5	-8.63320211521	0.920096666667
2011-04-04 08:59:20.300	Chamber.6	-15.5894385444	1.10418138889
2011-04-04 09:31:03.400	Chamber.1	-3.1959633045	1.0315075
2011-04-04 09:38:13.300	Chamber.2	-12.0923215917	1.09200432432
2011-04-04 09:45:32.200	Chamber.5	-30.6854351192	0.801290540541
2011-04-04 09:52:30.300	Chamber.6	-3.78015729417	0.956453611111
2011-04-04 10:30:59.800	Chamber.1	-1.73127648955	1.05696333333
2011-04-04 10:38:10.700	Chamber.2	-2.34732715831	1.03098277778
2011-04-04 10:45:22.700	Chamber.5	-4.08862692657	0.792197777778
2011-04-04 10:52:21.500	Chamber.6	-17.8268061644	1.05933555556
2011-04-04 11:30:59.900	Chamber.1	-0.440521574301	1.00974861111
2011-04-04 11:38:11.800	Chamber.2	-1.9288717033	0.980341351351
2011-04-04 11:45:20.000	Chamber.5	-8.47749478591	0.698260277778
2011-04-04 11:52:22.200	Chamber.6	-16.0864960553	0.968221666667
2011-04-04 12:30:59.900	Chamber.1	-8.46743031121	0.951728611111
2011-04-04 12:38:11.200	Chamber.2	-16.7203081407	0.869597222222
2011-04-04 12:45:21.800	Chamber.5	-17.7874603592	0.641635833333
2011-04-04 12:52:21.800	Chamber.6	-20.1950247127	0.887071388889
2011-04-04 13:30:59.900	Chamber.1	-6.73603168785	0.883289166667
2011-04-04 13:38:10.900	Chamber.2	-6.48170096007	0.932606756757
2011-04-04 13:45:20.100	Chamber.5	-2.83495813994	0.693564722222
2011-04-04 13:52:22.900	Chamber.6	-19.0193441746	1.0805475
2011-04-04 14:30:59.600	Chamber.1	-2.21683926305	1.00789277778
2011-04-04 14:38:10.800	Chamber.2	-8.19777949801	1.01851135135
2011-04-04 14:45:21.000	Chamber.5	-18.7733753013	0.729446111111
2011-04-04 14:52:20.800	Chamber.6	-9.54931396686	1.07351111111
2011-04-04 15:31:02.600	Chamber.1	-1.82169916414	1.30055944444
2011-04-04 15:38:12.400	Chamber.2	-1.20330121705	1.31898888889
2011-04-04 15:45:21.900	Chamber.5	-7.29226485875	1.07680805556
2011-04-04 15:52:21.700	Chamber.6	-15.2596922799	1.23823944444
2011-04-04 16:31:03.000	Chamber.1	-8.64891731307	1.01263777778
2011-04-04 16:38:09.800	Chamber.2	-4.23106444474	0.935375405405
2011-04-04 16:45:20.000	Chamber.5	-7.72184401868	0.730386944444
2011-04-04 16:52:19.700	Chamber.6	-19.8089598791	1.04472111111
2011-04-04 17:30:59.700	Chamber.1	-25.0786228354	0.896981388889
2011-04-04 17:38:11.000	Chamber.2	-4.92811544959	0.911045135135
2011-04-04 17:45:20.600	Chamber.5	-5.72174489994	0.693572222222
2011-04-04 17:52:21.700	Chamber.6	-2.37192129713	1.01733527778
2011-04-04 18:31:00.400	Chamber.1	1.33224638986	1.002695
2011-04-04 18:38:10.200	Chamber.2	13.9723759097	1.00655891892
2011-04-04 18:45:20.900	Chamber.5	0.46448002822	0.785594166667
2011-04-04 18:52:20.900	Chamber.6	-11.2419912371	1.01684944444
2011-04-04 19:31:03.200	Chamber.1	-14.2638446299	0.826183611111
2011-04-04 19:38:09.700	Chamber.2	-1.05561344148	0.687864324324
2011-04-04 19:45:20.000	Chamber.5	-2.04143510523	0.557643055556
2011-04-04 19:52:20.400	Chamber.6	-7.52552612151	0.827139166667
2011-04-04 20:31:00.800	Chamber.1	-0.73415715394	0.551505
2011-04-04 20:38:11.200	Chamber.2	-3.79973710833	0.498171944444
2011-04-04 20:45:22.200	Chamber.5	-3.91512355389	0.436825833333
2011-04-04 20:52:20.700	Chamber.6	-8.89843124826	0.725669166667
2011-04-04 21:31:03.000	Chamber.1	-1.17849001716	0.671872222222
2011-04-04 21:38:10.100	Chamber.2	0.165232393622	0.722378888889
2011-04-04 21:45:21.300	Chamber.5	-2.25095584923	0.537355277778
2011-04-04 21:52:20.000	Chamber.6	-9.90313022298	0.766749444444
2011-04-04 22:30:59.500	Chamber.1	0.377394734455	0.490629444444
2011-04-04 22:38:13.200	Chamber.2	-23.8825455928	0.545060810811
2011-04-04 22:45:20.000	Chamber.5	-1.94974551389	0.315539722222
2011-04-04 22:52:22.600	Chamber.6	-17.0938954264	0.486375277778
2011-04-04 23:31:01.000	Chamber.1	28.044815415	0.496293055556
2011-04-04 23:38:11.800	Chamber.2	-16.1580907986	0.44954972973
2011-04-04 23:45:19.700	Chamber.5	-3.47042537409	0.318849444444
2011-04-04 23:52:22.800	Chamber.6	-8.70480888398	0.612872222222
2011-04-05 00:31:03.400	Chamber.1	-15.0540553859	0.568970833333
2011-04-05 00:38:10.500	Chamber.2	-10.7932409929	0.505259444444
2011-04-05 00:45:21.400	Chamber.5	-2.67403777077	0.344800277778
2011-04-05 00:52:20.400	Chamber.6	-16.2538462557	0.547733611111
2011-04-05 01:31:01.700	Chamber.1	5.37115226239	0.498177777778
2011-04-05 01:38:11.200	Chamber.2	-1.93524479258	0.479307777778
2011-04-05 01:45:21.500	Chamber.5	-15.8650656907	0.335845
2011-04-05 01:52:20.200	Chamber.6	-3.76206498299	0.518005833333
2011-04-05 02:31:00.400	Chamber.1	-20.9964758217	0.3169625
2011-04-05 02:38:11.900	Chamber.2	-23.1352119882	0.309410277778
2011-04-05 02:45:22.700	Chamber.5	-9.92898292423	0.176325833333
2011-04-05 02:52:22.700	Chamber.6	-10.7409412533	0.467500555556
2011-04-05 03:31:02.000	Chamber.1	2.34068239203	0.336787777778
2011-04-05 03:38:11.600	Chamber.2	12.4933477463	0.294785277778
2011-04-05 03:45:21.000	Chamber.5	-0.788493452891	0.131965555556
2011-04-05 03:52:23.000	Chamber.6	-13.430331755	0.400971388889
2011-04-05 04:31:00.500	Chamber.1	-7.60245197283	0.249948055556
2011-04-05 04:38:10.600	Chamber.2	-8.35316582582	0.230593888889
2011-04-05 04:45:21.300	Chamber.5	-56.0600869632	0.153673888889
2011-04-05 04:52:20.100	Chamber.6	-27.3421615173	0.399551944444
2011-04-05 05:31:01.800	Chamber.1	-9.2148543961	0.174916388889
2011-04-05 05:38:09.800	Chamber.2	-8.67827600903	0.158871111111
2011-04-05 05:45:20.100	Chamber.5	-3.08353655265	0.0748708333333
2011-04-05 05:52:20.000	Chamber.6	-4.2514258032	0.276378055556
2011-04-05 06:31:02.100	Chamber.1	-34.0727330497	0.230123333333
2011-04-05 06:38:12.600	Chamber.2	-16.8982192926	0.265048888889
2011-04-05 06:45:22.700	Chamber.5	1.88904665493	0.24381
2011-04-05 06:52:20.800	Chamber.6	-1.87149625185	0.519425555556
2011-04-05 07:31:00.200	Chamber.1	-69.8338479941	0.551052222222
2011-04-05 07:38:11.000	Chamber.2	51.1211677512	0.627038055556
2011-04-05 07:45:22.000	Chamber.5	-0.841725250774	0.549627777778
2011-04-05 07:52:21.400	Chamber.6	-4.10506125174	0.838950833333
2011-04-05 09:31:02.100	Chamber.1	-0.929033877522	1.62511694444
2011-04-05 09:38:02.600	Chamber.2	-11.6685686288	1.58730621622
2011-04-05 09:45:12.500	Chamber.5	-4.46969616119	1.41258055556
2011-04-05 09:52:12.400	Chamber.6	-12.5795964133	1.71215405405
2011-04-05 10:31:03.200	Chamber.1	0.542138633039	2.193355
2011-04-05 10:38:04.300	Chamber.2	-1.729914871	2.47612027778
2011-04-05 10:45:12.800	Chamber.5	-11.2225790441	2.11301027778
2011-04-05 10:52:12.000	Chamber.6	-56.8568688952	2.58301243243
2011-04-05 11:31:03.500	Chamber.1	0.914289857559	3.56231361111
2011-04-05 11:38:02.000	Chamber.2	0.584840496993	3.56905783784
2011-04-05 11:45:11.800	Chamber.5	-11.4211757649	2.25909648649
2011-04-05 12:31:04.300	Chamber.1	13.5811321604	2.76072
2011-04-05 12:38:01.800	Chamber.2	0.980400101747	2.85569611111
2011-04-05 12:45:12.700	Chamber.5	-13.9763566503	2.74280472222
2011-04-05 12:52:11.500	Chamber.6	-14.9504595315	2.65398527778
2011-04-05 13:31:04.100	Chamber.1	1.25274242516	2.94084638889
2011-04-05 13:38:03.700	Chamber.2	-1.1850552062	3.39472888889
2011-04-05 13:45:11.700	Chamber.5	-3.81562515205	2.75357108108
2011-04-05 13:52:14.200	Chamber.6	-18.2264066627	3.05465277778
2011-04-05 14:31:01.600	Chamber.1	2.5585992181	3.28250970588
2011-04-05 15:31:00.700	Chamber.1	-7.81037603837	2.743325
2011-04-05 15:38:02.800	Chamber.2	2.09595738653	3.00354805556
2011-04-05 15:52:11.900	Chamber.5	-7.72989776024	2.22897083333
2011-04-05 15:59:11.200	Chamber.6	6.95295498588e-11	2.52265416667
2011-04-05 16:31:02.800	Chamber.1	-0.0835355408732	2.05735388889
2011-04-05 16:38:01.900	Chamber.2	-41.963105986	1.90338666667
2011-04-05 16:52:13.100	Chamber.5	-13.2619107998	1.58386972973
2011-04-05 16:59:13.600	Chamber.6	-18.2212424752	1.75796194444
2011-04-05 17:31:01.400	Chamber.1	-1.69918890037	1.37935111111
2011-04-05 17:38:03.000	Chamber.2	-17.2600291392	1.38076916667
2011-04-05 17:52:24.900	Chamber.5	-10.3310158639	1.06069081081
2011-04-05 17:59:23.500	Chamber.6	-12.6596152999	1.11119222222
2011-04-05 18:31:04.200	Chamber.1	-20.9301403753	0.682676944444
2011-04-05 18:38:03.400	Chamber.2	-19.8186395157	0.638799722222
2011-04-05 18:45:33.100	Chamber.5	-10.8467303317	0.418302432432
2011-04-05 18:52:31.300	Chamber.6	-9.98510193053	0.579345833333
2011-04-05 19:31:04.200	Chamber.1	-47.867603545	0.0720405555556
2011-04-05 19:38:02.900	Chamber.2	-25.8028578961	0.0776275675676
2011-04-05 19:46:03.300	Chamber.5	31.8767931329	-0.0794183333333
2011-04-05 19:53:02.500	Chamber.6	-2.32587157496	0.108375
2011-04-05 20:31:04.300	Chamber.1	8.77427080149	-0.111522777778
2011-04-05 20:38:03.900	Chamber.2	2.34581394405	-0.0615075
2011-04-05 20:45:11.100	Chamber.3	5.33360280846	0.0158997222222
2011-04-05 20:52:01.600	Chamber.5	-2.74394324383	0.0115251351351
2011-04-05 20:59:01.500	Chamber.6	-1.88059255225	0.288168888889
2011-04-05 21:31:02.200	Chamber.1	38.8191657336	0.392467222222
2011-04-05 21:38:01.400	Chamber.2	-0.607802495312	0.373783243243
2011-04-05 21:45:52.000	Chamber.5	-5.23489754107	0.263577297297
2011-04-05 21:52:50.600	Chamber.6	-2.83449632888	0.495345833333
2011-04-05 22:31:02.200	Chamber.1	2.18801903526	0.336314166667
2011-04-05 22:38:01.800	Chamber.2	-13.2988998106	0.362294594595
2011-04-05 22:52:12.100	Chamber.5	1.53412303284	0.34347972973
2011-04-05 22:59:23.600	Chamber.6	-8.21080191347	0.525554166667
2011-04-05 23:31:03.000	Chamber.1	13.7711558514	0.443902222222
2011-04-05 23:38:01.900	Chamber.2	13.9505429157	0.468368378378
2011-04-05 23:45:40.800	Chamber.5	-52.5754657437	0.356589722222
2011-04-06 00:31:01.900	Chamber.1	-10.2903510329	0.498653055556
2011-04-06 00:38:02.800	Chamber.2	31.4748692621	0.477890277778
2011-04-06 00:52:13.700	Chamber.5	60.7092223622	0.28791027027
2011-04-06 00:59:23.400	Chamber.6	-9.70345215134	0.505564054054
2011-04-06 01:31:02.700	Chamber.1	34.8454124766	0.624186944444
2011-04-06 01:38:04.200	Chamber.2	26.315708725	0.455699166667
2011-04-06 01:45:33.900	Chamber.5	30.4096464361	0.490410810811
2011-04-06 01:52:33.900	Chamber.6	-15.7972773359	0.577471388889
2011-04-06 02:31:01.800	Chamber.1	-8.77815884759	0.476935277778
2011-04-06 02:38:01.500	Chamber.2	-2.23297641614	0.459940277778
2011-04-06 02:45:21.600	Chamber.5	-1.6384249954	0.323083055556
2011-04-06 02:52:21.600	Chamber.6	-25.1706911653	0.527909722222
2011-04-06 03:31:03.100	Chamber.1	-9.19656181225	0.465148611111
2011-04-06 03:38:02.400	Chamber.2	1.80430582521	0.363686944444
2011-04-06 03:45:22.300	Chamber.5	-63.0610459481	0.289751621622
2011-04-06 03:52:21.600	Chamber.6	-6.73002064616	0.488265833333
2011-04-06 04:31:04.300	Chamber.1	17.1977372056	0.432097222222
2011-04-06 04:38:02.200	Chamber.2	-10.2195609692	0.408966944444
2011-04-06 04:45:23.000	Chamber.5	-6.70104611779	0.349896216216
2011-04-06 04:52:23.200	Chamber.6	-16.1415900375	0.513277777778
2011-04-06 05:31:01.400	Chamber.1	-8.07365520193	0.446738611111
2011-04-06 05:38:01.800	Chamber.2	-6.60150238629	0.477884166667
2011-04-06 05:45:21.100	Chamber.5	-2.2595165528	0.307991666667
2011-04-06 05:52:24.600	Chamber.6	-8.37065576299	0.569447222222
2011-04-06 06:31:02.100	Chamber.1	-0.869983949658	0.454280833333
2011-04-06 06:38:03.100	Chamber.2	-0.635025103283	0.523192222222
2011-04-06 06:45:23.700	Chamber.5	-1.10349620862	0.351879166667
2011-04-06 06:52:24.100	Chamber.6	-5.11297988544	0.651109722222
2011-04-06 07:31:02.400	Chamber.1	-26.5301542817	0.619006666667
2011-04-06 07:38:01.500	Chamber.2	-3.01868263844	0.626088055556
2011-04-06 07:45:21.700	Chamber.5	-2.34702398663	0.444864444444
2011-04-06 07:52:23.900	Chamber.6	-0.935101664657	0.727577777778
2011-04-06 08:31:00.600	Chamber.1	0.626415007978	0.695968888889
2011-04-06 08:38:03.500	Chamber.2	-90.4337946094	0.574228055556
2011-04-06 09:45:16.600	Chamber.5	6.849583178	0.828683888889
2011-04-06 09:52:29.400	Chamber.6	-5.05648609913	1.03686277778
2011-04-06 10:45:30.300	Chamber.5	-20.5947399242	0.716882222222
2011-04-06 11:31:03.600	Chamber.1	-8.14707929596	1.385905
2011-04-06 12:31:06.500	Chamber.1	19.7325587205	1.72850972973
2011-04-06 12:38:05.700	Chamber.2	-53.4168063237	1.78203222222
2011-04-06 12:52:16.300	Chamber.5	42.8851669348	1.41750837838
2011-04-06 12:59:15.200	Chamber.6	-4.25987957222	1.67628166667
2011-04-06 13:31:06.500	Chamber.1	2.47599299794	1.76797972973
2011-04-06 13:38:06.500	Chamber.2	7.90436957209	1.78287305556
2011-04-06 13:52:15.700	Chamber.5	-6.57178526285	1.50048638889
2011-04-06 13:59:15.200	Chamber.6	15.2632073661	1.8454927027
2011-04-06 14:31:04.600	Chamber.1	2.19134349025	1.51830648649
2011-04-06 14:38:07.500	Chamber.2	-32.4770701747	1.60185
2011-04-06 14:52:17.600	Chamber.5	-1.22093259313	1.46313162162
2011-04-06 14:59:17.500	Chamber.6	-35.1020328785	1.56004027027
2011-04-06 15:31:07.900	Chamber.1	-15.6331265319	1.25098111111
2011-04-06 15:38:07.800	Chamber.2	-20.5670066577	1.28683888889
2011-04-06 15:52:18.500	Chamber.5	1.89191575593	1.17097513514
2011-04-06 15:59:17.900	Chamber.6	-14.6287878838	1.53989027778
2011-04-06 16:31:08.000	Chamber.1	0.434532013716	1.47427388889
2011-04-06 16:38:06.900	Chamber.2	-11.180736358	1.43556861111
2011-04-06 16:52:14.700	Chamber.5	-9.2277075076	1.14661459459
2011-04-06 16:59:17.100	Chamber.6	12.4354442581	1.38954702703
2011-04-06 17:31:08.600	Chamber.1	47.5980473169	1.02011111111
2011-04-06 17:38:07.400	Chamber.2	27.9518203209	1.03194388889
2011-04-06 17:52:16.900	Chamber.5	15.6216433292	0.81816
2011-04-06 17:59:16.300	Chamber.6	-8.26986400207	1.14617108108
2011-04-06 18:31:05.400	Chamber.1	25.9980798336	0.810447567568
2011-04-06 18:38:05.000	Chamber.2	37.0593354177	0.834194444444
2011-04-06 18:52:17.100	Chamber.5	-1.71575457876	0.688846944444
2011-04-06 18:59:16.400	Chamber.6	51.6009082475	0.903688378378
2011-04-06 19:31:05.500	Chamber.1	25.8163183897	0.646052432432
2011-04-06 19:38:04.900	Chamber.2	-0.961404158784	0.6841275
2011-04-06 19:52:14.800	Chamber.5	84.984136728	0.481220540541
2011-04-06 19:59:18.000	Chamber.6	4.90485245274	0.759154444444
2011-04-06 20:31:06.800	Chamber.1	32.1487537534	0.590509189189
2011-04-06 20:38:05.500	Chamber.2	-58.5978980342	0.651086944444
2011-04-06 20:51:57.600	Chamber.5	92.8664999211	0.414168611111
2011-04-06 20:58:57.200	Chamber.6	29.6336745013	0.723767222222
2011-04-06 21:31:06.200	Chamber.1	-76.8512851512	0.485355405405
2011-04-06 21:38:06.200	Chamber.2	114.452698462	0.5614225
2011-04-06 21:45:07.800	Chamber.3	-8.62807956292	0.283449444444
2011-04-06 21:52:16.600	Chamber.5	83.5779520103	0.382048108108
2011-04-06 22:31:07.500	Chamber.1	20.0792482977	0.534955135135
2011-04-06 22:38:08.500	Chamber.2	-1.88687723034	0.504315555556
2011-04-06 22:45:48.100	Chamber.5	17.1278183675	0.339135
2011-04-06 22:52:44.600	Chamber.6	62.7123202041	0.552863243243
2011-04-06 23:31:08.300	Chamber.1	24.7548567441	0.518469166667
2011-04-06 23:38:07.800	Chamber.2	1.39094385803	0.537351944444
2011-04-06 23:52:17.000	Chamber.5	-17.397285158	0.275431388889
2011-04-07 00:31:06.600	Chamber.1	-0.370493691773	0.320049189189
2011-04-07 00:38:06.500	Chamber.2	0.70254220179	0.319315833333
2011-04-07 00:52:16.200	Chamber.5	26.9493032858	0.187358378378
2011-04-07 00:59:16.900	Chamber.6	-0.9478756191	0.438517027027
2011-04-07 01:31:08.300	Chamber.1	27.3696687131	0.349437567568
2011-04-07 01:38:06.800	Chamber.2	0.284660890688	0.3396025
2011-04-07 01:52:15.100	Chamber.5	-9.72454503025	0.174435
2011-04-07 01:59:15.500	Chamber.6	30.6501534385	0.541379459459
2011-04-07 02:31:05.100	Chamber.1	14.5990239878	0.392145675676
2011-04-07 02:38:06.000	Chamber.2	-6.67025165107	0.338674166667
2011-04-07 02:52:16.000	Chamber.5	-0.255385850492	0.169912702703
2011-04-07 02:59:16.200	Chamber.6	22.8872825844	0.46147972973
2011-04-07 03:31:05.400	Chamber.1	-50.7556853148	0.261283513514
2011-04-07 03:38:05.200	Chamber.2	-31.0152925685	0.28251
2011-04-07 03:52:18.200	Chamber.5	30.228571694	0.137158333333
2011-04-07 03:59:16.300	Chamber.6	5.20746384171	0.314086486486
2011-04-07 04:31:07.800	Chamber.1	11.3819191827	0.154617777778
2011-04-07 04:38:08.400	Chamber.2	-32.5619446721	0.136213333333
2011-04-07 04:52:18.200	Chamber.5	-51.1716190715	-0.00730432432432
2011-04-07 04:59:18.200	Chamber.6	-6.94539878208	0.26646
2011-04-07 05:31:07.300	Chamber.1	23.5200210256	0.142815945946
2011-04-07 05:38:07.000	Chamber.2	0.0228894040411	0.155087777778
2011-04-07 05:52:17.100	Chamber.5	-30.8712576409	0.0689002702703
2011-04-07 05:59:16.300	Chamber.6	-47.0646777937	0.314548378378
2011-04-07 06:31:08.000	Chamber.1	-9.78048905697	0.310348888889
2011-04-07 06:38:07.700	Chamber.2	-17.0618236096	0.303745833333
2011-04-07 06:52:16.800	Chamber.5	-122.1661069	0.168531081081
2011-04-07 06:59:16.200	Chamber.6	-47.9649900365	0.421526216216
2011-04-07 07:31:04.700	Chamber.1	64.2613626713	0.435305945946
2011-04-07 07:38:05.600	Chamber.2	37.3012856224	0.469859444444
2011-04-07 07:52:16.900	Chamber.5	35.6430811547	0.471120540541
2011-04-07 07:59:18.000	Chamber.6	25.2292526344	0.766720833333
2011-04-07 08:31:08.000	Chamber.1	5.0071771454	1.37326416667
2011-04-07 08:38:07.200	Chamber.2	55.7684996823	1.61830027778
2011-04-07 08:52:14.600	Chamber.5	-38.0682271775	1.38791527778
2011-04-07 08:59:15.400	Chamber.6	28.4980777273	1.87149540541
2011-04-07 09:31:05.100	Chamber.1	18.8552146286	2.33587945946
2011-04-07 09:38:06.500	Chamber.2	2.14355571091	2.52053333333
2011-04-07 09:52:15.300	Chamber.5	18.0639453735	1.83511324324
2011-04-07 09:59:16.900	Chamber.6	0.613411165282	2.56098297297
2011-04-07 10:31:05.800	Chamber.1	1.18457233567	2.68128081081
2011-04-07 10:38:07.000	Chamber.2	-1.29266225053	2.82170777778
2011-04-07 10:52:18.000	Chamber.5	0.920789433425	2.40148054054
2011-04-07 10:59:16.000	Chamber.6	1.68729679686	2.95465351351
2011-04-07 11:31:07.500	Chamber.1	3.57147369877	3.05172277778
2011-04-07 11:38:04.500	Chamber.2	-0.217301419531	3.00915694444
2011-04-07 11:52:14.800	Chamber.5	-11.1567112308	2.13909108108
2011-04-07 11:59:17.000	Chamber.6	-5.95494728741	2.37428594595
2011-04-07 12:31:08.100	Chamber.1	-4.1154246758	1.95283555556
2011-04-07 12:38:06.400	Chamber.2	-3.92961273065	1.91083722222
2011-04-07 12:52:16.200	Chamber.5	-21.1892927816	1.52943972222
2011-04-07 12:59:14.900	Chamber.6	-21.3942439032	1.67708027027
2011-04-07 13:31:05.100	Chamber.1	-2.7927464365	1.64897945946
2011-04-07 13:38:08.100	Chamber.2	-79.1532248128	1.69933694444
2011-04-07 13:52:15.800	Chamber.5	-6.31027192467	1.09749972222
2011-04-07 13:59:15.500	Chamber.6	-25.1066651776	1.34362918919
2011-04-07 14:31:06.600	Chamber.1	9.43142440181	1.1038427027
2011-04-07 14:38:06.300	Chamber.2	-2.08353890784	0.987106666667
2011-04-07 14:52:17.600	Chamber.5	-10.8251721886	0.746616756757
2011-04-07 14:59:16.300	Chamber.6	-7.07721491849	0.998253513514
2011-04-07 15:31:07.000	Chamber.1	-13.1971508562	0.73330972973
2011-04-07 15:38:06.800	Chamber.2	-12.547030263	0.790779722222
2011-04-07 15:52:16.700	Chamber.5	-14.6403806682	0.636916388889
2011-04-07 15:59:16.000	Chamber.6	-9.1515726412	0.851335135135
2011-04-07 16:31:07.700	Chamber.1	-0.292096483741	0.698287222222
2011-04-07 16:38:07.100	Chamber.2	-0.648786165721	0.636464166667
2011-04-07 16:52:17.700	Chamber.5	-24.7061347489	0.4453175
2011-04-07 16:59:16.500	Chamber.6	-2.07246470537	0.656647837838
2011-04-07 17:31:04.900	Chamber.1	0.992711328211	0.574897027027
2011-04-07 17:38:08.000	Chamber.2	-8.4482055842	0.599644722222
2011-04-07 17:52:17.300	Chamber.5	-1.7603669759	0.478923513514
2011-04-07 17:59:16.500	Chamber.6	-2.23354091725	0.65664
2011-04-07 18:31:07.400	Chamber.1	-8.78374974688	0.457344864865
2011-04-07 18:38:07.600	Chamber.2	-14.8049272421	0.423134166667
2011-04-07 18:52:18.600	Chamber.5	-22.2046246573	0.180926486486
2011-04-07 18:59:17.600	Chamber.6	-2.78869496668	0.421988648649
2011-04-07 19:31:05.300	Chamber.1	1.26602722483	0.138232702703
2011-04-07 19:38:07.500	Chamber.2	-13.6189704326	0.172544444444
2011-04-07 19:52:15.400	Chamber.5	-7.34107495528	-0.0430919444444
2011-04-07 19:59:18.100	Chamber.6	-0.623257000591	0.156501111111
2011-04-07 20:31:04.600	Chamber.1	0.00205845317196	0.0243743243243
2011-04-07 20:38:07.700	Chamber.2	-8.24089077774	0.0168363888889
2011-04-07 20:52:16.200	Chamber.5	-19.1010563938	-0.149746111111
2011-04-07 20:59:15.800	Chamber.6	-7.90414861619	0.085427027027
2011-04-07 21:31:06.900	Chamber.1	-0.194303248492	-0.0422221621622
2011-04-07 21:38:07.400	Chamber.2	-3.09448871497	-0.0440577777778
2011-04-07 21:52:16.400	Chamber.5	-5.26664999853	-0.145976944444
2011-04-07 21:59:15.900	Chamber.6	-1.46995225525	0.0982818918919
2011-04-07 22:31:05.200	Chamber.1	13.7634692719	-0.0334983783784
2011-04-07 22:38:05.200	Chamber.2	-1.90345307066	-0.019045
2011-04-07 22:52:16.700	Chamber.5	-20.2180601399	-0.138428888889
2011-04-07 22:59:15.800	Chamber.6	-42.1279241676	0.0904759459459
2011-04-07 23:31:08.400	Chamber.1	-1.88506584083	-0.0421752777778
2011-04-07 23:38:08.500	Chamber.2	-10.9270818525	-0.0416997222222
2011-04-07 23:52:15.500	Chamber.5	-4.21215026592	-0.146441388889
2011-04-08 00:31:07.800	Chamber.1	1.73687175776	-0.0336588888889
2011-04-08 00:38:06.800	Chamber.2	-5.0738798081	-0.0516002777778
2011-04-08 00:52:17.100	Chamber.5	-21.6598696748	-0.160202702703
2011-04-08 00:59:16.800	Chamber.6	-1.71661587824	0.0656810810811
2011-04-08 01:31:05.700	Chamber.1	0.0529853477888	0.0211640540541
2011-04-08 01:38:06.800	Chamber.2	-33.9503570819	0.00740944444444
2011-04-08 01:52:34.700	Chamber.6	-7.81202461305	0.126304444444
2011-04-08 02:31:06.500	Chamber.1	-10.6900816998	0.0441151351351
2011-04-08 02:38:05.600	Chamber.2	-0.794129326282	0.0597736111111
2011-04-08 02:45:46.000	Chamber.5	-2.75387474309	-0.0660832432432
2011-04-08 02:52:45.500	Chamber.6	-33.6414972151	0.167828333333
2011-04-08 03:31:07.600	Chamber.1	6.94928364078	0.154146944444
2011-04-08 03:38:07.200	Chamber.2	-26.3160887233	0.218798055556
2011-04-08 03:52:17.100	Chamber.5	-1.94018632716	0.0716597297297
2011-04-08 03:59:17.100	Chamber.6	-17.1912605663	0.387279444444
2011-04-08 04:31:05.200	Chamber.1	-11.4917534786	0.286996486486
2011-04-08 04:38:07.800	Chamber.2	-19.9848488701	0.397180833333
2011-04-08 04:52:18.200	Chamber.5	-21.9410223117	0.217855
2011-04-08 04:59:17.700	Chamber.6	10.5610592877	0.46844
2011-04-08 05:31:07.900	Chamber.1	-29.5647038509	0.3292325
2011-04-08 05:38:08.200	Chamber.2	13.6350904609	0.509495555556
2011-04-08 05:46:07.300	Chamber.5	-5.84151035047	0.275419722222
2011-04-08 05:53:06.500	Chamber.6	-0.471287106896	0.542756216216
2011-04-08 06:31:06.500	Chamber.1	18.5861303212	0.547347567568
2011-04-08 06:38:07.600	Chamber.2	-28.4143221563	0.634098888889
2011-04-08 06:52:14.800	Chamber.5	-3.91564105724	0.342432222222
2011-04-08 06:59:14.700	Chamber.6	-20.0818708429	0.60384
2011-04-08 07:31:06.100	Chamber.1	-2.27746156066	0.598783783784
2011-04-08 07:38:05.500	Chamber.2	-26.3419137536	0.625604444444
2011-04-08 07:52:18.000	Chamber.5	-14.060602552	0.477878888889
2011-04-08 07:59:18.400	Chamber.6	11.5407634399	0.813906388889
2011-04-08 08:31:06.000	Chamber.1	-25.673201507	0.657547297297
2011-04-08 08:38:05.600	Chamber.2	-0.455413389196	0.694968611111
2011-04-08 08:52:16.200	Chamber.5	-1.76698886127	0.483057837838
2011-04-08 08:59:16.200	Chamber.6	0.332618241599	0.770062702703
2011-04-08 09:31:04.600	Chamber.1	1.34869448481	0.691072432432
2011-04-08 09:38:06.500	Chamber.2	-22.3692562677	0.646358611111
2011-04-08 09:52:14.800	Chamber.5	-12.6045516546	0.4495625
2011-04-08 09:59:16.800	Chamber.6	-20.152155884	0.726905135135
2011-04-08 10:31:08.100	Chamber.1	21.1761798578	0.918147222222
2011-04-08 10:38:06.200	Chamber.2	-37.6447445915	0.8676775
2011-04-08 10:52:16.200	Chamber.5	-7.04967677878	0.669488648649
2011-04-08 10:59:17.500	Chamber.6	0.00348527061148	1.0304227027
2011-04-08 11:31:05.200	Chamber.1	2.45682104054	1.24810054054
2011-04-08 11:38:05.600	Chamber.2	-19.4033231247	1.16081027778
2011-04-08 11:52:18.000	Chamber.5	-17.3405847607	1.00597222222
2011-04-08 11:59:15.200	Chamber.6	-3.1907287631	1.51769567568
2011-04-08 12:31:06.400	Chamber.1	0.422365553997	1.37396162162
2011-04-08 12:38:05.600	Chamber.2	-7.29606594105	1.54553944444
2011-04-08 12:52:16.200	Chamber.5	-7.88860767441	1.38036594595
2011-04-08 12:59:17.000	Chamber.6	-4.60301193657	1.81213351351
2011-04-08 13:31:07.700	Chamber.1	1.92895896497	2.05865277778
2011-04-08 13:38:05.600	Chamber.2	-3.71979638075	1.98788166667
2011-04-08 13:52:18.000	Chamber.5	-1.64649596597	1.86415305556
2011-04-08 13:59:15.700	Chamber.6	0.303777548319	2.17914405405
2011-04-08 14:31:07.600	Chamber.1	-13.6006908938	2.25979861111
2011-04-08 14:38:05.600	Chamber.2	-1.28116945445	2.30036694444
2011-04-08 14:52:16.100	Chamber.5	-17.9547155293	1.90290916667
2011-04-08 14:59:15.700	Chamber.6	-2.14297489298	2.39463648649
2011-04-08 15:31:06.200	Chamber.1	-18.6082597682	2.31645833333
2011-04-08 15:38:06.100	Chamber.2	-1.99140703844	2.35427888889
2011-04-08 15:52:16.600	Chamber.5	-4.16489690713	1.95809333333
2011-04-08 15:59:17.000	Chamber.6	2.54086197088	2.34398189189
2011-04-08 16:38:07.500	Chamber.2	0.780977637226	2.09115611111
2011-04-08 16:52:15.900	Chamber.5	-18.7474678648	1.49725138889
2011-04-08 16:59:16.600	Chamber.6	21.5530024475	1.78033189189
2011-04-08 17:31:07.900	Chamber.1	-1.29414550308	1.28393611111
2011-04-08 17:38:05.000	Chamber.2	-7.28585929176	1.23390416667
2011-04-08 17:52:17.000	Chamber.5	-81.3224578625	0.794824594595
2011-04-08 17:59:18.100	Chamber.6	-57.3040822417	1.01917305556
2011-04-08 18:31:07.300	Chamber.1	28.6131226567	0.856795405405
2011-04-08 18:52:16.200	Chamber.5	2.25604366158	0.718586486486
2011-04-08 18:59:16.700	Chamber.6	48.6368655659	0.987653783784
2011-04-08 19:31:05.500	Chamber.1	8.31419647046	0.458252162162
2011-04-08 19:38:08.200	Chamber.2	-1.78051372175	0.473616388889
2011-04-08 19:59:14.800	Chamber.6	-15.5075018657	0.376949189189
2011-04-08 20:52:16.800	Chamber.5	12.2620668267	-0.0348510810811
2011-04-08 20:59:16.800	Chamber.6	26.5223552837	0.195161621622
2011-04-08 21:52:17.400	Chamber.5	-17.2138719518	-0.0389816216216
2011-04-08 21:59:18.500	Chamber.6	-8.60205760356	0.199450555556
2011-04-08 22:52:16.500	Chamber.5	-7.3276766684	-0.153043611111
2011-04-08 22:59:15.300	Chamber.6	0.170005396181	0.0578775675676
2011-04-08 23:52:15.700	Chamber.5	-14.7903448117	-0.263442777778
2011-04-09 00:52:15.100	Chamber.5	-14.6873074258	-0.509727777778
2011-04-09 00:59:16.700	Chamber.6	-2.43260724724	-0.306170810811
2011-04-09 01:52:16.100	Chamber.5	-14.4296589232	-0.584816486486
2011-04-09 01:59:17.200	Chamber.6	-2.37725665758	-0.443444594595
2011-04-09 02:52:17.100	Chamber.5	-21.6580554346	-0.515991081081
2011-04-09 02:59:18.600	Chamber.6	-7.47130927815	-0.244670810811
2011-04-09 03:52:17.100	Chamber.5	-18.454776295	-0.839158648649
2011-04-09 03:59:15.700	Chamber.6	-11.9127759929	-0.681713243243
2011-04-09 04:52:18.100	Chamber.5	-5.91419726663	-0.825400833333
2011-04-09 04:59:15.800	Chamber.6	-20.1683331941	-0.609650810811
2011-04-09 05:52:16.600	Chamber.5	-10.0362903435	-0.793713783784
2011-04-09 05:59:14.700	Chamber.6	-1.86800671341	-0.734033783784
2011-04-09 06:52:16.500	Chamber.5	-13.4450773887	-0.893339166667
2011-04-09 06:59:15.100	Chamber.6	-14.3266008924	-0.696867297297
2011-04-09 07:38:08.300	Chamber.2	-31.3356757386	-0.339914722222
2011-04-09 07:52:18.100	Chamber.5	-7.50668138426	-0.372940555556
2011-04-09 07:59:19.300	Chamber.6	-2.52964129277	-0.162502432432
2011-04-09 08:52:15.000	Chamber.5	-19.3105160189	-0.0197081081081
2011-04-09 08:59:16.600	Chamber.6	-9.51996511542	0.430249189189
2011-04-09 09:38:06.100	Chamber.2	-8.63147725795	1.51534472222
2011-04-09 09:52:17.300	Chamber.5	-13.2111990545	0.970698378378
2011-04-09 10:52:18.200	Chamber.5	-17.1049175911	1.98402166667
2011-04-09 10:59:16.100	Chamber.6	-34.3097904811	2.49286945946
2011-04-09 11:31:05.000	Chamber.1	-1.69043856211	5.19253675676
2011-04-09 11:38:06.600	Chamber.2	-17.0821808966	5.00545444444
2011-04-09 11:52:17.900	Chamber.5	-12.6619543836	2.44905444444
2011-04-09 11:59:16.000	Chamber.6	-0.0415275799642	3.14797297297
2011-04-09 12:52:15.500	Chamber.5	-12.4198872454	2.77802567568
2011-04-09 12:59:17.900	Chamber.6	-11.3387085292	3.12178194444
2011-04-09 13:31:07.000	Chamber.1	-2.87741745008	3.65832891892
2011-04-09 13:52:17.400	Chamber.5	-14.747286227	3.74431944444
2011-04-09 14:38:07.600	Chamber.2	-8.43970509194	4.50692055556
2011-04-09 14:52:15.200	Chamber.5	-8.86450748234	3.66707027778
2011-04-09 14:59:16.000	Chamber.6	0.692446318378	4.36743081081
2011-04-09 15:38:08.100	Chamber.2	-10.8906272184	3.50273972222
2011-04-09 15:52:18.000	Chamber.5	-13.8505279046	3.09077621622
2011-04-09 15:59:17.800	Chamber.6	-1.45525085199	3.56187055556
2011-04-09 16:38:07.600	Chamber.2	-8.57282113305	3.121015
2011-04-09 16:52:15.200	Chamber.5	-25.6665975309	2.69465611111
2011-04-09 16:59:16.400	Chamber.6	-7.83726455266	3.18990189189
2011-04-09 17:52:17.000	Chamber.5	-11.1190566218	2.20082166667
2011-04-09 17:59:15.500	Chamber.6	-11.296040107	2.33127378378
2011-04-09 18:52:18.400	Chamber.5	-15.4229508547	2.1608825
2011-04-09 18:59:16.200	Chamber.6	-11.535331465	2.43013351351
2011-04-09 19:51:56.000	Chamber.5	-13.8153821077	1.53310648649
2011-04-09 19:58:57.000	Chamber.6	-3.56261340918	1.81154972222
2011-04-09 20:45:25.400	Chamber.5	-17.3050732251	1.22060388889
2011-04-09 20:52:26.600	Chamber.6	-0.0526883579575	1.35587594595
2011-04-09 21:45:26.400	Chamber.5	-26.2444684247	1.10192189189
2011-04-09 21:52:26.700	Chamber.6	-12.2706328014	1.24705324324
2011-04-09 22:45:24.800	Chamber.5	-19.5101294552	0.737841621622
2011-04-09 23:45:25.300	Chamber.5	-10.9525892504	0.981647297297
2011-04-09 23:52:26.700	Chamber.6	-7.68938697164	1.47947378378
2011-04-10 00:45:27.000	Chamber.5	-6.13267796913	0.569850277778
2011-04-10 00:52:26.400	Chamber.6	-0.287304033824	0.859519459459
2011-04-10 01:45:28.400	Chamber.5	-16.8764113093	-0.102798648649
2011-04-10 01:52:26.300	Chamber.6	-18.3540438052	0.224521621622
2011-04-10 02:45:26.700	Chamber.5	-9.00055504212	-0.0553608333333
2011-04-10 02:52:25.500	Chamber.6	-2.24528553204	0.258056756757
2011-04-10 03:45:27.200	Chamber.5	-13.9601160299	0.0234386111111
2011-04-10 03:52:27.000	Chamber.6	-11.8222110653	0.227756756757
2011-04-10 04:52:15.100	Chamber.5	-10.9689012843	-0.281831111111
2011-04-10 04:59:16.500	Chamber.6	-1.97966365114	-0.0578116216216
2011-04-10 05:52:17.500	Chamber.5	-9.54821047135	-0.420919459459
2011-04-10 05:59:18.000	Chamber.6	-3.78051836605	-0.216731666667
2011-04-10 06:52:17.100	Chamber.5	-7.40467038289	-0.00675833333333
2011-04-10 06:59:16.900	Chamber.6	-1.62299961285	0.189632702703
2011-04-10 07:52:15.000	Chamber.5	-24.4332334953	0.623061081081
2011-04-10 07:59:16.100	Chamber.6	-1.73047475047	0.8912275
2011-04-10 08:52:17.100	Chamber.5	-7.13528331498	1.60670783784
2011-04-10 08:59:17.500	Chamber.6	-1.64278279156	1.98566540541
2011-04-10 09:52:16.200	Chamber.5	-7.48640800323	2.47758189189
2011-04-10 09:59:18.600	Chamber.6	-1.71814729432	3.24210972973
2011-04-10 10:31:06.900	Chamber.1	-1.88065058386	3.33857297297
2011-04-10 10:38:08.500	Chamber.2	-24.9234109772	5.05142472222
2011-04-10 10:52:18.500	Chamber.5	-12.4496916094	3.58980621622
2011-04-10 10:59:18.200	Chamber.6	-2.40731900077	4.11261694444
2011-04-10 11:38:06.900	Chamber.2	-4.62092635109	6.49892916667
2011-04-10 11:52:18.000	Chamber.5	-11.1960928672	3.79658555556
2011-04-10 11:59:14.800	Chamber.6	-6.84688506016	4.32729378378
2011-04-10 12:52:18.300	Chamber.5	-21.1477227652	4.44819702703
2011-04-10 12:59:18.300	Chamber.6	-2.30408505155	4.71143833333
2011-04-10 13:38:05.100	Chamber.2	-1.87461352015	5.21916805556
2011-04-10 13:52:16.300	Chamber.5	-11.9229712482	4.228865
2011-04-10 13:59:16.300	Chamber.6	-0.548665259177	4.68732189189
2011-04-10 14:38:07.100	Chamber.2	-12.0060335019	4.48490555556
2011-04-10 14:52:17.300	Chamber.5	-11.777405958	4.09469861111
2011-04-10 15:38:08.400	Chamber.2	-4.76129484892	4.20084361111
2011-04-10 15:52:18.600	Chamber.5	-26.7515226431	3.94349944444
2011-04-10 16:52:18.000	Chamber.5	-14.0272179848	3.47577486486
2011-04-10 16:59:17.500	Chamber.6	-8.65063436352	3.84573378378
2011-04-10 18:59:17.800	Chamber.6	-4.125144947	1.85342138889
2011-04-10 19:59:16.600	Chamber.6	-1.92491588885	0.634925945946
2011-04-10 21:59:16.200	Chamber.6	1.10632466505	0.321838378378
2011-04-11 01:59:14.800	Chamber.6	-1.2672437225	-0.572868918919
2011-04-11 02:59:18.300	Chamber.6	-9.00260957564	-0.278529166667
2011-04-11 03:59:17.500	Chamber.6	-1.609891991	-0.204261351351
2011-04-11 04:59:19.000	Chamber.6	-34.1663340368	-0.0638702777778
2011-04-11 06:59:17.100	Chamber.6	-0.791090068707	0.281925135135
2011-04-11 07:59:15.300	Chamber.6	0.799223499642	0.547297567568
2011-04-11 08:59:15.700	Chamber.6	-6.36280686282	0.769103783784
2011-04-11 10:52:17.800	Chamber.5	-14.7630243357	1.13646243243
2011-04-11 10:59:14.600	Chamber.6	-8.72506990935	1.59078916667
2011-04-11 11:52:17.100	Chamber.5	-19.7248395342	1.36837567568
2011-04-11 11:59:17.900	Chamber.6	-2.26896469176	1.79616638889
2011-04-11 12:59:17.600	Chamber.6	-15.6153142469	2.10460108108
2011-04-11 13:59:15.000	Chamber.6	-7.27498968458	2.14908135135
2011-04-11 14:59:15.500	Chamber.6	-7.45425528257	1.82110945946
2011-04-11 15:59:15.100	Chamber.6	-1.64741142855	1.86566378378
2011-04-11 16:59:16.300	Chamber.6	-15.9560356547	1.9773
2011-04-11 18:59:17.600	Chamber.6	-2.21078017994	1.07944756757
2011-04-11 21:59:18.300	Chamber.6	-0.667479422546	0.46795
2011-04-12 04:59:16.600	Chamber.6	0.966992794321	0.286018378378
2011-04-12 08:59:15.400	Chamber.6	5.88749920634e-07	2.30432810811
2011-04-12 11:59:15.900	Chamber.6	-1.49422023774	4.10895405405
2011-04-12 12:59:15.500	Chamber.6	-4.70937827605	3.12870027027
2011-04-12 15:59:15.100	Chamber.6	-9.63286789699	5.23029162162
2011-04-12 16:59:15.200	Chamber.6	-16.5002929391	3.01796324324
2011-04-12 18:59:14.700	Chamber.6	-3.18414724155	1.47451944444
2011-04-12 19:59:18.000	Chamber.6	-4.98462933926	1.17812833333
2011-04-13 12:59:15.500	Chamber.6	-8.66743778743	2.58036216216
2011-04-13 13:59:15.300	Chamber.6	-1.99370805451	2.52255135135
2011-04-13 16:59:17.200	Chamber.6	-1.7959087011	1.9882
2011-04-13 22:59:15.800	Chamber.6	-26.333851268	0.433434054054
2011-04-14 09:59:17.200	Chamber.6	-0.0239278994215	2.81353135135
2011-04-14 10:45:05.700	Chamber.3	-1.79967639645	2.8838625
2011-04-14 11:59:16.100	Chamber.6	-1.10940957583	3.20190945946
2011-04-14 12:59:16.100	Chamber.6	-10.4080941181	3.24560189189
2011-04-14 13:59:17.000	Chamber.6	-1.27452231322	3.81763810811
2011-04-14 14:45:06.400	Chamber.3	-0.185022268836	3.45555111111
2011-04-14 18:45:06.200	Chamber.3	-6.18393288577	1.65383138889
2011-04-14 19:45:05.900	Chamber.3	-1.92799287188	0.608983611111
2011-04-15 10:45:07.000	Chamber.3	0.490449815667	3.67586055556
2011-04-15 10:59:17.300	Chamber.6	-0.593835406249	5.24702081081
2011-04-15 11:38:07.700	Chamber.2	-4.50385442044	6.43789777778
2011-04-15 12:38:05.100	Chamber.2	-3.85324573981	6.03581361111
2011-04-15 12:45:07.200	Chamber.3	0.158398769429	4.84227361111
2011-04-15 13:38:08.100	Chamber.2	-9.57045267608	6.98307111111
2011-04-15 13:45:05.300	Chamber.3	0.839072779443	6.28259861111
2011-04-15 13:52:15.700	Chamber.5	-5.26909654533	6.42218083333
2011-04-15 14:31:08.300	Chamber.1	-0.343969746828	6.33532472222
2011-04-15 14:45:06.500	Chamber.3	0.593068595514	5.92522611111
2011-04-15 14:59:16.000	Chamber.6	-1.50719073687	5.89726945946
2011-04-15 15:38:07.300	Chamber.2	-6.52704438216	5.9440725
2011-04-15 15:45:07.100	Chamber.3	0.952053977436	5.57841861111
2011-04-15 15:59:16.500	Chamber.6	-1.72864881392	5.48235540541
2011-04-15 16:45:07.800	Chamber.3	-0.151303901405	3.95853166667
2011-04-15 16:59:18.300	Chamber.6	-1.69339121753	4.399195
2011-04-15 17:45:07.200	Chamber.3	-1.66352710561	3.21819027778
2011-04-15 17:59:14.900	Chamber.6	-5.39257057683	3.44698513514
2011-04-15 18:45:07.100	Chamber.3	-1.68858691985	2.77767805556
2011-04-15 18:59:17.300	Chamber.6	-2.47444525216	2.92699027027
2011-04-15 19:45:05.100	Chamber.3	-0.29301354744	1.91814861111
2011-04-15 20:45:06.000	Chamber.3	-0.263501865148	1.42254472222
2011-04-15 21:45:05.100	Chamber.3	-0.755126432146	1.00774222222
2011-04-15 22:45:04.600	Chamber.3	2.67452611379	0.582574722222
2011-04-15 22:59:18.500	Chamber.6	-2.3791399805	0.537276666667
2011-04-15 23:45:05.200	Chamber.3	-4.30138733491	0.378726388889
2011-04-16 00:45:06.600	Chamber.3	0.709832067226	0.421209722222
2011-04-16 00:59:16.700	Chamber.6	-2.91774390119	0.563821621622
2011-04-16 01:45:05.700	Chamber.3	-1.90369859361	0.287641666667
2011-04-16 01:59:18.100	Chamber.6	-2.14296209888	0.353717222222
2011-04-16 02:45:06.200	Chamber.3	-0.389156782918	0.151773611111
2011-04-16 03:45:07.900	Chamber.3	-7.23566348991	0.0725005555556
2011-04-16 06:45:08.000	Chamber.3	-0.270654868497	0.349958888889
2011-04-16 07:45:07.300	Chamber.3	-0.602316827207	1.37124694444
2011-04-16 08:59:17.100	Chamber.6	-1.64578235781	3.49110864865
2011-04-16 09:45:05.400	Chamber.3	0.708621908741	3.787195
2011-04-16 10:45:06.800	Chamber.3	5.57224350686	5.52646833333
2011-04-16 10:59:16.800	Chamber.6	-2.02478629725	7.03014027027
2011-04-16 11:31:08.200	Chamber.1	2.47441264786	11.6914972222
2011-04-16 11:38:07.700	Chamber.2	-0.0181183029322	10.2522069444
2011-04-16 11:45:06.000	Chamber.3	0.371899225304	6.75258944444
2011-04-16 12:31:05.100	Chamber.1	1.2227692366	7.51723378378
2011-04-16 12:38:05.600	Chamber.2	-8.95708619888	6.84485194444
2011-04-16 12:45:05.300	Chamber.3	0.340529037356	5.8083175
2011-04-16 13:31:07.800	Chamber.1	1.44559014322	7.77448888889
2011-04-16 13:38:05.800	Chamber.2	-3.38744136557	7.90038277778
2011-04-16 13:45:05.900	Chamber.3	1.07203893809	7.08114194444
2011-04-16 13:59:15.900	Chamber.6	-2.28252471788	7.30127702703
2011-04-16 14:31:07.600	Chamber.1	0.651032012453	7.6857227027
2011-04-16 14:38:08.100	Chamber.2	-7.77740383338	7.18768138889
2011-04-16 14:45:08.200	Chamber.3	0.832933961516	6.84988166667
2011-04-16 14:52:16.100	Chamber.5	-13.0807065556	6.52305108108
2011-04-16 14:59:17.200	Chamber.6	-2.26676997748	7.26298864865
2011-04-16 15:31:06.600	Chamber.1	1.19858089371	6.88201081081
2011-04-16 15:38:06.900	Chamber.2	-4.81118342031	6.3296325
2011-04-16 15:45:08.800	Chamber.3	0.822084279795	6.62224638889
2011-04-16 16:31:07.700	Chamber.1	0.427425944705	5.46502810811
2011-04-16 16:38:08.300	Chamber.2	-3.18878338643	5.49061444444
2011-04-16 16:45:05.800	Chamber.3	0.62224582953	5.51001166667
2011-04-16 16:59:16.700	Chamber.6	-25.4343525561	5.60816864865
2011-04-16 17:31:07.400	Chamber.1	0.319911175086	5.18097513514
2011-04-16 17:38:05.900	Chamber.2	-4.81726921787	4.94875138889
2011-04-16 17:45:05.000	Chamber.3	0.850925892031	4.41745305556
2011-04-16 17:59:16.500	Chamber.6	-3.71575863943	4.53823189189
2011-04-16 18:31:08.000	Chamber.1	-1.32069058207	3.71876916667
2011-04-16 18:38:07.200	Chamber.2	-8.15346605087	3.73855222222
2011-04-16 18:45:06.200	Chamber.3	-0.869795890629	3.63425416667
2011-04-16 18:59:16.100	Chamber.6	-0.486615545158	3.61790594595
2011-04-16 19:31:07.200	Chamber.1	-1.02272740604	2.61194297297
2011-04-16 19:38:06.300	Chamber.2	-4.82504456185	2.48075833333
2011-04-16 19:45:05.800	Chamber.3	-3.16868571997	2.29904722222
2011-04-16 19:59:18.300	Chamber.6	-1.80247392829	2.02191777778
2011-04-16 20:31:05.600	Chamber.1	-0.123317950957	1.30939243243
2011-04-16 20:45:06.100	Chamber.3	-0.935949831092	1.35598611111
2011-04-16 21:45:06.100	Chamber.3	-1.91888333492	0.787351111111
2011-04-16 21:59:17.100	Chamber.6	-1.06017582809	0.752033783784
2011-04-16 22:31:09.000	Chamber.1	-0.320693143954	0.377394864865
2011-04-16 22:45:08.700	Chamber.3	-1.46676777861	0.550966111111
2011-04-16 22:59:16.200	Chamber.6	-5.39706618961	0.530748108108
2011-04-16 23:31:04.500	Chamber.1	-0.416890685533	0.287651388889
2011-04-16 23:45:05.100	Chamber.3	-1.9050946431	0.470283611111
2011-04-17 00:45:07.100	Chamber.3	-1.33051786611	0.425451111111
2011-04-17 00:59:15.300	Chamber.6	-1.32676340484	0.619387297297
2011-04-17 01:31:05.900	Chamber.1	-0.813846472226	0.705249189189
2011-04-17 01:45:07.700	Chamber.3	-0.928677955521	0.913909166667
2011-04-17 01:59:15.300	Chamber.6	-0.93722588313	1.09235648649
2011-04-17 02:31:04.900	Chamber.1	-1.20161225016	1.03767972973
2011-04-17 02:38:08.800	Chamber.2	-4.22194229116	1.04650111111
2011-04-17 02:45:07.900	Chamber.3	-0.491308799425	1.05170555556
2011-04-17 03:31:07.400	Chamber.1	0.788732149771	0.968347567568
2011-04-17 03:45:08.800	Chamber.3	-1.07283610491	0.973343055556
2011-04-17 04:31:07.600	Chamber.1	-0.0182101303648	0.891687222222
2011-04-17 04:45:08.500	Chamber.3	0.742014557966	0.90868
2011-04-17 04:59:16.500	Chamber.6	-1.81557462301	1.02303135135
2011-04-17 05:31:07.900	Chamber.1	-0.626790704411	0.9280375
2011-04-17 05:45:06.500	Chamber.3	-1.01343088457	0.944101944444
2011-04-17 05:59:15.800	Chamber.6	-1.63322141083	1.15570540541
2011-04-17 06:45:05.700	Chamber.3	-1.7526419792	0.911983055556
2011-04-17 06:59:15.100	Chamber.6	-10.1625051986	1.19566108108
2011-04-17 07:45:08.200	Chamber.3	-0.497658945035	1.86026666667
2011-04-17 07:59:15.900	Chamber.6	-1.29342298173	2.32554162162
2011-04-17 08:31:05.000	Chamber.1	-0.0261777791544	3.77844675676
2011-04-17 08:38:08.500	Chamber.2	-3.89901239794	3.34950777778
2011-04-17 08:45:06.300	Chamber.3	-0.468002441579	3.16898805556
2011-04-17 08:59:18.300	Chamber.6	-0.867162232287	4.25401638889
2011-04-17 09:31:05.700	Chamber.1	0.913943238016	5.93797513514
2011-04-17 09:38:07.100	Chamber.2	-13.4740312187	6.72278805556
2011-04-17 09:45:08.300	Chamber.3	0.953089131385	5.24574416667
2011-04-17 09:52:15.200	Chamber.5	-3.04722688234	5.32054189189
2011-04-17 09:59:15.100	Chamber.6	-0.864154781748	7.63137648649
2011-04-17 10:31:06.000	Chamber.1	0.259768573691	6.23708783784
2011-04-17 10:38:08.100	Chamber.2	-2.76995641866	6.71328333333
2011-04-17 10:45:06.700	Chamber.3	-1.68486243109	5.66306611111
2011-04-17 10:52:15.900	Chamber.5	-7.42579605839	6.30080702703
2011-04-17 10:59:14.700	Chamber.6	-2.22817171922	7.70876891892
2011-04-17 11:38:06.700	Chamber.2	-1.91061919061	9.74919944444
2011-04-17 11:45:04.900	Chamber.3	-0.857257994707	6.93271111111
2011-04-17 11:52:16.200	Chamber.5	-4.30280998856	7.09756722222
2011-04-17 11:59:16.600	Chamber.6	-1.2598585302	8.9128072973
2011-04-17 12:31:07.900	Chamber.1	1.21957276176	8.35985638889
2011-04-17 12:38:07.000	Chamber.2	4.56235801666e-15	8.59053194444
2011-04-17 12:45:06.200	Chamber.3	0.204253320447	8.01539111111
2011-04-17 12:52:14.900	Chamber.5	-6.4458112063	7.75921432432
2011-04-17 12:59:17.800	Chamber.6	-0.482885852717	8.44574916667
2011-04-17 13:38:05.100	Chamber.2	-1.14429447413	9.55087777778
2011-04-17 13:45:06.800	Chamber.3	1.24158684937	8.51268027778
2011-04-17 13:52:18.000	Chamber.5	-2.5008806954	7.38000054054
2011-04-17 13:59:17.700	Chamber.6	-1.76209136746	8.19029944444
2011-04-17 14:31:06.300	Chamber.1	2.41963550614	7.89740891892
2011-04-17 14:38:05.700	Chamber.2	-8.63774645211	8.15240111111
2011-04-17 14:45:06.600	Chamber.3	1.58509889018	8.33903361111
2011-04-17 14:52:18.500	Chamber.5	-2.1575118756	7.35582138889
2011-04-17 14:59:16.100	Chamber.6	-2.23523225854	7.92927783784
2011-04-17 15:38:04.700	Chamber.2	-2.23503581265	7.93339666667
2011-04-17 15:45:05.000	Chamber.3	0.927600327185	8.21389527778
2011-04-17 15:52:18.300	Chamber.5	-1.64749604799	7.0401672973
2011-04-17 15:59:17.300	Chamber.6	-0.613836010559	7.35652648649
2011-04-17 16:31:07.000	Chamber.1	0.480768199753	6.2809927027
2011-04-17 16:38:06.100	Chamber.2	-5.16665166723	6.89620805556
2011-04-17 16:45:06.500	Chamber.3	-0.679185493136	7.05747138889
2011-04-17 16:52:14.800	Chamber.5	-1.88235392422	5.65962
2011-04-17 16:59:15.500	Chamber.6	-1.79284154219	6.26847027027
2011-04-17 17:31:05.700	Chamber.1	1.9158701411	5.37941459459
2011-04-17 17:38:06.100	Chamber.2	-3.46936729289	5.45039611111
2011-04-17 17:45:07.600	Chamber.3	0.73233001688	5.93197888889
2011-04-17 17:52:16.500	Chamber.5	-2.33222109394	5.09920567568
2011-04-17 17:59:18.800	Chamber.6	-7.77544470844	5.50696837838
2011-04-17 18:31:05.400	Chamber.1	0.459700912092	4.59001351351
2011-04-17 18:38:04.800	Chamber.2	-4.45788179531	4.82784111111
2011-04-17 18:45:04.700	Chamber.3	-1.61032305294	4.69219444444
2011-04-17 18:52:18.500	Chamber.5	-8.06131540257	3.61592666667
2011-04-17 18:59:16.400	Chamber.6	-0.931986902576	3.99441513514
2011-04-17 19:31:05.200	Chamber.1	0.147641734718	3.1110027027
2011-04-17 19:38:05.600	Chamber.2	-5.6836600531	3.21338833333
2011-04-17 19:45:08.100	Chamber.3	-1.03754299958	3.28134944444
2011-04-17 19:52:16.500	Chamber.5	-5.23580437779	2.463195
2011-04-17 19:59:14.800	Chamber.6	0.0951637174792	2.75317378378
2011-04-17 20:31:05.800	Chamber.1	-0.841685961521	2.07032702703
2011-04-17 20:38:07.600	Chamber.2	-3.86305346381	2.18760916667
2011-04-17 20:45:06.100	Chamber.3	-0.451886333582	2.29713611111
2011-04-17 20:52:16.800	Chamber.5	-5.34928116434	1.75484972973
2011-04-17 20:59:14.600	Chamber.6	-1.28055280698	2.08274108108
2011-04-17 21:31:06.500	Chamber.1	-1.61286328484	1.81135162162
2011-04-17 21:38:04.900	Chamber.2	-4.95862764718	1.92285111111
2011-04-17 21:45:06.500	Chamber.3	-1.34482029055	2.108845
2011-04-17 21:52:16.900	Chamber.5	-3.64023468995	1.53490054054
2011-04-17 21:59:18.700	Chamber.6	-1.29031076109	1.94089027027
2011-04-17 22:31:05.400	Chamber.1	-0.204701242099	1.78296243243
2011-04-17 22:38:08.500	Chamber.2	-13.9658147293	1.88802527778
2011-04-17 22:45:06.300	Chamber.3	-0.403342019324	2.06499638889
2011-04-17 22:52:18.200	Chamber.5	-8.97348638273	1.54624694444
2011-04-17 22:59:16.400	Chamber.6	-1.03037861833	1.89961324324
2011-04-17 23:31:06.200	Chamber.1	0.497784379807	1.89318216216
2011-04-17 23:38:08.200	Chamber.2	-7.28259708824	2.21606
2011-04-17 23:45:06.800	Chamber.3	-0.371091231834	2.69427694444
2011-04-17 23:52:18.500	Chamber.5	-13.727279782	2.30977918919
2011-04-18 00:31:06.400	Chamber.1	0.0968081432519	2.73107297297
2011-04-18 00:38:04.700	Chamber.2	-11.7559566699	2.76477527778
2011-04-18 00:45:08.400	Chamber.3	-1.26017921833	2.97161027778
2011-04-18 00:52:15.600	Chamber.5	-6.59666848416	2.42669111111
2011-04-18 00:59:15.900	Chamber.6	0.330030003447	2.85604108108
2011-04-18 01:31:05.100	Chamber.1	-0.624397355833	2.3859872973
2011-04-18 01:38:07.000	Chamber.2	-4.46265531403	2.53755972222
2011-04-18 01:45:06.100	Chamber.3	-0.306388566966	2.84209777778
2011-04-18 01:52:17.800	Chamber.5	-4.33040956825	2.19076405405
2011-04-18 01:59:17.100	Chamber.6	0.832981681828	3.09441513514
2011-04-18 02:31:07.700	Chamber.1	-0.991764564449	2.8326225
2011-04-18 02:38:08.100	Chamber.2	-2.58107391785	3.13764777778
2011-04-18 02:45:07.700	Chamber.3	-0.00818980854789	3.59198777778
2011-04-18 02:52:18.100	Chamber.5	-5.36343306955	3.06590833333
2011-04-18 02:59:16.600	Chamber.6	-1.04222985718	3.83831621622
2011-04-18 03:31:06.600	Chamber.1	1.05003288709	4.08417378378
2011-04-18 03:38:06.400	Chamber.2	-2.71519390722	4.25228861111
2011-04-18 03:45:08.600	Chamber.3	-0.320347506395	4.27593694444
2011-04-18 03:52:18.900	Chamber.5	-1.77670036399	3.34498694444
2011-04-18 03:59:17.100	Chamber.6	-2.31143249622	3.63292324324
2011-04-18 04:31:06.300	Chamber.1	-0.841403292019	3.64578297297
2011-04-18 04:38:05.900	Chamber.2	-1.62560291221	4.15550888889
2011-04-18 04:45:05.700	Chamber.3	-0.311564983615	4.41766611111
2011-04-18 04:52:15.000	Chamber.5	-1.2575698566	3.90184378378
2011-04-18 04:59:18.200	Chamber.6	-9.03075178823	4.26743777778
2011-04-18 05:31:08.400	Chamber.1	-0.194851654094	4.00084388889
2011-04-18 05:38:07.700	Chamber.2	-2.07787210219	4.34892333333
2011-04-18 05:45:08.000	Chamber.3	-1.09290678088	4.46089138889
2011-04-18 05:52:18.200	Chamber.5	-5.36838743392	3.33439555556
2011-04-18 05:59:16.800	Chamber.6	-1.05231725106	3.92813324324
2011-04-18 06:31:06.500	Chamber.1	1.88008874457	3.67956864865
2011-04-18 06:38:05.200	Chamber.2	-7.37391221118	3.72308444444
2011-04-18 06:45:08.100	Chamber.3	-0.950114416912	3.93190222222
2011-04-18 06:52:18.400	Chamber.5	-5.22415374209	3.18293527778
2011-04-18 06:59:16.800	Chamber.6	-1.46066819401	3.84410540541
2011-04-18 07:38:05.800	Chamber.2	-9.59735311561	4.14202694444
2011-04-18 07:45:05.000	Chamber.3	-1.30994266699	4.505645
2011-04-18 07:52:18.500	Chamber.5	-4.03213661845	3.64325444444
2011-04-18 07:59:15.300	Chamber.6	-1.31560938124	4.20529918919
2011-04-18 08:38:05.600	Chamber.2	-2.93621459789	5.09728194444
2011-04-18 08:45:04.800	Chamber.3	0.420884829596	5.03918722222
2011-04-18 08:52:17.800	Chamber.5	-0.672900126989	4.43262972222
2011-04-18 08:59:16.000	Chamber.6	-1.93367312013	5.22331918919
2011-04-18 09:38:05.400	Chamber.2	-2.13531052911	6.78755027778
2011-04-18 09:45:08.700	Chamber.3	-0.772863814587	5.83371027778
2011-04-18 09:52:18.400	Chamber.5	-0.854602659139	5.40894777778
2011-04-18 10:38:06.300	Chamber.2	-2.48076615208	8.78176416667
2011-04-18 10:45:07.900	Chamber.3	-0.361711771933	6.34618
2011-04-18 10:52:18.100	Chamber.5	-1.78137061922	6.27960432432
2011-04-18 10:59:18.400	Chamber.6	-1.144688967	7.26924166667
2011-04-18 11:31:08.000	Chamber.1	1.29498110687	11.3238552778
2011-04-18 11:38:08.100	Chamber.2	-3.00957171451	8.93620777778
2011-04-18 11:45:08.100	Chamber.3	0.371513445204	6.78077722222
2011-04-18 11:52:18.100	Chamber.5	-1.68854251124	6.32713324324
2011-04-18 11:59:18.300	Chamber.6	-1.9753094632	7.25110305556
2011-04-18 12:38:05.500	Chamber.2	-3.58312224698	6.73253805556
2011-04-18 12:45:07.900	Chamber.3	0.521288078049	6.69792305556
2011-04-18 12:52:16.900	Chamber.5	-2.38813899548	6.05678916667
2011-04-18 12:59:15.500	Chamber.6	-1.9009975905	6.33450540541
2011-04-18 13:38:05.900	Chamber.2	-0.863281274818	7.32150277778
2011-04-18 13:45:07.100	Chamber.3	1.07781562939	7.06018416667
2011-04-18 13:52:15.800	Chamber.5	-2.07728237383	6.02848611111
2011-04-18 13:59:16.500	Chamber.6	-1.87705194637	6.23520135135
2011-04-18 14:38:06.100	Chamber.2	-1.38966068623	6.17921361111
2011-04-18 14:45:05.800	Chamber.3	-0.141715429376	6.88426388889
2011-04-18 14:52:17.200	Chamber.5	-1.20861340332	6.23633777778
2011-04-18 15:38:06.600	Chamber.2	-6.06846865922	5.61022166667
2011-04-18 15:45:05.000	Chamber.3	0.414421185023	5.62822444444
2011-04-18 15:52:17.400	Chamber.5	-1.83447981434	4.4024475
2011-04-18 15:59:16.400	Chamber.6	-0.919208855163	4.75647351351
2011-04-18 16:31:05.800	Chamber.1	0.0162588916558	4.86947108108
2011-04-18 16:38:05.800	Chamber.2	-10.730144958	5.09631194444
2011-04-18 16:45:07.000	Chamber.3	0.271600217622	5.47188277778
2011-04-18 16:52:16.800	Chamber.5	-7.68303470861	4.50965305556
2011-04-18 16:59:15.600	Chamber.6	-1.94214862578	4.74397459459
2011-04-18 17:31:07.700	Chamber.1	-1.22737580318	4.2275272973
2011-04-18 17:38:07.800	Chamber.2	-2.09863312042	4.40715388889
2011-04-18 17:45:07.000	Chamber.3	0.874495930855	4.43641888889
2011-04-18 17:52:17.400	Chamber.5	-2.84521063838	3.59064027778
2011-04-18 17:59:18.100	Chamber.6	-3.38115259605	4.30529277778
2011-04-18 18:31:08.300	Chamber.1	-0.565218888259	3.18792485714
2011-04-18 18:38:08.200	Chamber.2	-3.27713511725	3.36349222222
2011-04-18 18:45:07.000	Chamber.3	-1.12279155226	3.63027083333
2011-04-18 18:52:17.800	Chamber.5	-5.36405378449	2.71855916667
2011-04-18 18:59:17.100	Chamber.6	-2.26915211849	3.15472594595
2011-04-18 19:31:07.900	Chamber.1	-0.770261099064	1.81649138889
2011-04-18 19:38:05.700	Chamber.2	-4.5500153203	1.75138055556
2011-04-18 19:45:07.200	Chamber.3	0.85490594187	1.89864666667
2011-04-18 19:52:17.100	Chamber.5	-3.90684257039	1.16334
2011-04-18 19:59:17.200	Chamber.6	-0.427127777761	1.30197513514
2011-04-18 20:31:05.200	Chamber.1	1.72782964035	0.563267297297
2011-04-18 20:38:07.100	Chamber.2	-5.84623710153	0.610820833333
2011-04-18 20:45:08.400	Chamber.3	-1.48000199069	0.813734444444
2011-04-18 20:52:15.400	Chamber.5	-5.54618288844	0.174021081081
2011-04-18 20:59:15.300	Chamber.6	-0.994464105566	0.322747567568
2011-04-18 21:31:07.600	Chamber.1	-0.693910522648	-0.25699027027
2011-04-18 21:38:06.300	Chamber.2	-6.3499599192	-0.175177777778
2011-04-18 21:45:07.600	Chamber.3	-1.46466730027	0.122050833333
2011-04-18 21:52:15.900	Chamber.5	-11.6986598626	-0.307028108108
2011-04-18 21:59:18.300	Chamber.6	-1.78787413738	-0.0369458333333
2011-04-18 22:31:06.500	Chamber.1	0.392490871519	-0.848148648649
2011-04-18 22:38:06.700	Chamber.2	-5.61647439537	-0.843145555556
2011-04-18 22:45:06.600	Chamber.3	-2.73317580503	-0.652107777778
2011-04-18 22:52:17.600	Chamber.5	-7.10600350814	-1.13501351351
2011-04-18 22:59:18.200	Chamber.6	-2.02665994696	-0.893629722222
2011-04-18 23:31:08.100	Chamber.1	-0.376318142751	-1.74024444444
2011-04-18 23:38:05.700	Chamber.2	-5.68719805006	-1.63788611111
2011-04-18 23:45:08.500	Chamber.3	-2.07658327155	-1.18044166667
2011-04-18 23:52:18.300	Chamber.5	-6.60062465358	-1.60724444444
2011-04-19 00:31:05.400	Chamber.1	-1.25756590554	-1.72702972973
2011-04-19 00:38:07.900	Chamber.2	-7.75098110091	-1.57806388889
2011-04-19 00:45:07.900	Chamber.3	-1.28799805355	-1.14180833333
2011-04-19 00:52:18.100	Chamber.5	-7.04714512209	-1.63346486486
2011-04-19 00:59:18.600	Chamber.6	-0.340031319818	-1.33801666667
2011-04-19 01:31:05.900	Chamber.1	-0.332919572931	-2.05608108108
2011-04-19 01:38:08.100	Chamber.2	-3.06429657413	-2.00251111111
2011-04-19 01:45:06.800	Chamber.3	-1.11444850966	-1.58703611111
2011-04-19 01:52:18.700	Chamber.5	-5.2929154	-2.10462432432
2011-04-19 01:59:17.200	Chamber.6	-0.655007842499	-1.88757837838
2011-04-19 02:31:08.300	Chamber.1	-0.0694349418042	-2.43203611111
2011-04-19 02:38:05.400	Chamber.2	-9.81051418775	-2.35375
2011-04-19 02:45:08.200	Chamber.3	-1.16837690542	-1.90815555556
2011-04-19 02:52:18.200	Chamber.5	-5.67986723952	-2.45925135135
2011-04-19 02:59:15.700	Chamber.6	-0.315822211288	-2.13533783784
2011-04-19 03:31:06.300	Chamber.1	-0.378495341483	-2.53406216216
2011-04-19 03:38:05.300	Chamber.2	-10.0931155287	-2.42498055556
2011-04-19 03:45:08.300	Chamber.3	-1.5899637895	-1.90114166667
2011-04-19 03:52:17.400	Chamber.5	-9.42594142411	-2.54873243243
2011-04-19 03:59:15.900	Chamber.6	-2.13044990338	-2.24095945946
2011-04-19 04:31:05.000	Chamber.1	-0.753720527947	-2.58908378378
2011-04-19 04:38:05.300	Chamber.2	-7.7332102396	-2.45753333333
2011-04-19 04:45:08.100	Chamber.3	0.698220841885	-1.97377222222
2011-04-19 04:52:17.400	Chamber.5	-9.45684284376	-2.58488333333
2011-04-19 04:59:16.300	Chamber.6	-0.897364409767	-2.24737567568
2011-04-19 05:31:08.900	Chamber.1	-1.86422601582	-2.49973513514
2011-04-19 05:38:05.500	Chamber.2	-5.18312926748	-2.33025833333
2011-04-19 05:45:08.100	Chamber.3	-0.69008004301	-1.88515277778
2011-04-19 05:52:18.000	Chamber.5	-10.7555597454	-2.4589
2011-04-19 05:59:17.800	Chamber.6	-1.97890580927	-2.06435277778
2011-04-19 06:31:05.200	Chamber.1	-1.06841812537	-1.8263027027
2011-04-19 06:38:06.100	Chamber.2	-4.31959882755	-1.60883055556
2011-04-19 06:45:07.200	Chamber.3	-0.292196184764	-1.12583888889
2011-04-19 06:52:18.200	Chamber.5	-3.66460112335	-1.47956388889
2011-04-19 06:59:16.000	Chamber.6	-1.74128492386	-0.952922972973
2011-04-19 07:31:08.600	Chamber.1	-0.653044079802	-0.227578055556
2011-04-19 07:38:08.400	Chamber.2	-4.39304192831	0.174901666667
2011-04-19 07:45:07.500	Chamber.3	-0.98906718908	0.507586944444
2011-04-19 07:52:18.200	Chamber.5	-6.80097279637	0.408175405405
2011-04-19 07:59:19.500	Chamber.6	-1.12802885473	0.813161621622
2011-04-19 08:38:05.000	Chamber.2	-3.99657857012	2.12325666667
2011-04-19 08:45:07.800	Chamber.3	-0.657435452936	1.88861083333
2011-04-19 08:52:15.000	Chamber.5	-7.23719864034	1.81290162162
2011-04-19 08:59:18.800	Chamber.6	-1.34634634239	2.52218861111
2011-04-19 09:38:06.600	Chamber.2	-5.00755445185	5.05094222222
2011-04-19 09:45:08.800	Chamber.3	0.318747096267	3.31435388889
2011-04-19 09:52:16.700	Chamber.5	-21.543210956	3.38337918919
2011-04-19 09:59:18.200	Chamber.6	-0.484561552309	5.44907833333
2011-04-19 10:38:07.300	Chamber.2	-3.60203541943	8.60121055556
2011-04-19 10:45:07.100	Chamber.3	-0.33204787413	4.950785
2011-04-19 10:52:15.400	Chamber.5	-2.02547630541	5.21487277778
2011-04-19 10:59:16.300	Chamber.6	-1.19442504919	6.44045783784
2011-04-19 11:38:08.300	Chamber.2	-5.03876836614	9.2690175
2011-04-19 11:45:06.700	Chamber.3	0.889294328047	5.847805
2011-04-19 11:52:16.000	Chamber.5	-5.03017073125	5.62584324324
2011-04-19 12:31:05.000	Chamber.1	0.329909711962	6.84070567568
2011-04-19 12:38:06.800	Chamber.2	-5.01406676727	6.59058666667
2011-04-19 12:45:07.600	Chamber.3	0.0411872407382	6.59766305556
2011-04-19 12:52:18.700	Chamber.5	-2.02665934622	6.13149621622
2011-04-19 12:59:16.800	Chamber.6	-2.03508273488	6.27256459459
2011-04-19 13:31:06.500	Chamber.1	0.985612438194	7.03370810811
2011-04-19 13:38:07.700	Chamber.2	-2.59973694099	7.91457861111
2011-04-19 13:45:06.800	Chamber.3	1.37884637548	7.19405833333
2011-04-19 13:52:19.200	Chamber.5	-2.11645868172	6.20036648649
2011-04-19 13:59:16.500	Chamber.6	-0.0539651156748	6.16627297297
2011-04-19 14:31:07.400	Chamber.1	1.46931408686	6.85196378378
2011-04-19 14:38:07.900	Chamber.2	-3.1354935533	6.78346638889
2011-04-19 14:45:07.700	Chamber.3	-0.743645274375	6.97670611111
2011-04-19 14:52:15.900	Chamber.5	-2.34911632378	6.16429888889
2011-04-19 14:59:17.200	Chamber.6	-1.10730518894	6.17286216216
2011-04-19 15:31:08.200	Chamber.1	-0.117863669897	6.1241725
2011-04-19 15:38:08.700	Chamber.2	-3.38242292093	6.39881666667
2011-04-19 15:45:07.600	Chamber.3	0.984072857016	6.72343444444
2011-04-19 15:52:17.000	Chamber.5	-1.00667821631	5.94536810811
2011-04-19 15:59:17.400	Chamber.6	-1.42865603661	6.06062351351
2011-04-19 16:31:05.000	Chamber.1	1.61373103269	5.51272432432
2011-04-19 16:38:07.100	Chamber.2	-8.90590459561	5.96434194444
2011-04-19 16:45:05.600	Chamber.3	-0.709817656785	5.83963527778
2011-04-19 16:52:18.500	Chamber.5	-11.6408183224	4.85169648649
2011-04-19 16:59:16.100	Chamber.6	-2.00906531704	4.83056621622
2011-04-19 17:31:06.800	Chamber.1	0.0651320643163	5.05587486486
2011-04-19 17:38:06.200	Chamber.2	-4.80832185685	5.2817375
2011-04-19 17:45:08.100	Chamber.3	0.554821152777	5.24818916667
2011-04-19 17:52:16.800	Chamber.5	-6.54810250572	4.14689459459
2011-04-19 17:59:16.100	Chamber.6	-2.1330970959	4.29212783784
2011-04-19 18:31:08.700	Chamber.1	-0.308605784064	3.13149416667
2011-04-19 18:38:06.000	Chamber.2	-4.6369491847	3.17304
2011-04-19 18:45:05.700	Chamber.3	-0.425397363641	3.18345361111
2011-04-19 18:52:16.300	Chamber.5	-2.17066553634	2.26004138889
2011-04-19 18:59:17.500	Chamber.6	-0.810371429034	2.41771583333
2011-04-19 19:31:05.900	Chamber.1	0.0232054519644	1.28859432432
2011-04-19 19:38:06.100	Chamber.2	-8.17668745932	1.27704972222
2011-04-19 19:45:08.700	Chamber.3	0.0647484312479	1.42333361111
2011-04-19 19:52:15.500	Chamber.5	-3.42143026637	0.594749444444
2011-04-19 19:59:17.600	Chamber.6	-0.720699907078	0.634398108108
2011-04-19 20:31:05.000	Chamber.1	-0.146507584939	-0.501133513514
2011-04-19 20:38:07.400	Chamber.2	-1.91841940115	-0.576561388889
2011-04-19 20:45:05.800	Chamber.3	-0.450018916005	-0.480818333333
2011-04-19 20:52:18.800	Chamber.5	-9.30378531228	-1.02978027027
2011-04-19 20:59:19.100	Chamber.6	-2.1130180744	-0.878434444444
2011-04-19 21:31:07.800	Chamber.1	-0.639999835179	-1.86596944444
2011-04-19 21:38:06.600	Chamber.2	-5.37006941592	-1.89665277778
2011-04-19 21:45:08.100	Chamber.3	-1.37591348061	-1.52037777778
2011-04-19 21:52:17.800	Chamber.5	-9.45761568109	-2.09751891892
2011-04-19 21:59:15.100	Chamber.6	-1.21990784862	-1.71768648649
2011-04-19 22:31:05.800	Chamber.1	0.107064643582	-2.46046756757
2011-04-19 22:38:05.900	Chamber.2	-8.24777251955	-2.43661388889
2011-04-19 22:45:07.900	Chamber.3	-1.29667240849	-2.02643611111
2011-04-19 22:52:17.400	Chamber.5	-5.12691323175	-2.62296216216
2011-04-19 22:59:19.300	Chamber.6	-2.49104200419	-2.16514324324
2011-04-19 23:31:08.300	Chamber.1	-0.123417314015	-2.86248055556
2011-04-19 23:38:08.800	Chamber.2	-7.5742917096	-2.83323888889
2011-04-19 23:45:07.600	Chamber.3	-2.16779274771	-2.38110555556
2011-04-19 23:52:17.000	Chamber.5	-3.59337572033	-3.04544444444
2011-04-20 00:31:05.300	Chamber.1	0.308469715611	-3.26671621622
2011-04-20 00:38:05.300	Chamber.2	-4.99719888066	-3.27226666667
2011-04-20 00:45:05.400	Chamber.3	-1.03596192133	-2.878175
2011-04-20 00:52:18.000	Chamber.5	-3.70738283312	-3.46695277778
2011-04-20 00:59:18.600	Chamber.6	-1.26205772932	-3.14216666667
2011-04-20 01:31:05.500	Chamber.1	0.133116293913	-3.35847567568
2011-04-20 01:38:07.500	Chamber.2	-7.07614067618	-3.17941666667
2011-04-20 01:45:05.500	Chamber.3	-1.23891472836	-2.72069166667
2011-04-20 01:52:15.900	Chamber.5	-5.93095300131	-3.04088888889
2011-04-20 01:59:16.900	Chamber.6	-1.90023529424	-2.4846972973
2011-04-20 02:31:05.100	Chamber.1	0.00651033197285	-2.24428378378
2011-04-20 02:38:08.100	Chamber.2	-6.712160758	-2.14600277778
2011-04-20 02:45:04.700	Chamber.3	-1.68725787101	-1.90174166667
2011-04-20 02:52:15.900	Chamber.5	-6.3529641792	-2.20734444444
2011-04-20 02:59:17.900	Chamber.6	-1.42608800166	-1.71109459459
2011-04-20 03:31:07.100	Chamber.1	-0.383849076015	-1.58484324324
2011-04-20 03:38:05.200	Chamber.2	-8.7575214834	-1.55594166667
2011-04-20 03:45:07.100	Chamber.3	-1.53975778251	-1.409275
2011-04-20 03:52:18.400	Chamber.5	-5.60185550538	-1.65542222222
2011-04-20 03:59:16.700	Chamber.6	-2.12606485693	-1.20764594595
2011-04-20 04:31:05.000	Chamber.1	-0.739640430346	-1.08601351351
2011-04-20 04:38:08.000	Chamber.2	-8.47551202416	-1.02768333333
2011-04-20 04:45:08.000	Chamber.3	-0.948572791029	-0.930993055556
2011-04-20 04:52:15.200	Chamber.5	-3.1842193804	-1.13808055556
2011-04-20 04:59:16.200	Chamber.6	-1.19684860198	-0.677991891892
2011-04-20 05:31:07.700	Chamber.1	-0.337026745042	-0.52145027027
2011-04-20 05:38:06.000	Chamber.2	-7.53767187106	-0.46112
2011-04-20 05:45:05.500	Chamber.3	-0.556594274588	-0.414399722222
2011-04-20 05:52:17.000	Chamber.5	-8.45393700765	-0.560649444444
2011-04-20 05:59:17.800	Chamber.6	-0.92935193078	-0.133565675676
2011-04-20 06:31:05.600	Chamber.1	-1.14710488058	0.414605945946
2011-04-20 06:38:07.100	Chamber.2	-9.37936359981	0.464139722222
2011-04-20 06:45:07.400	Chamber.3	-1.23550168648	0.348048611111
2011-04-20 06:52:17.400	Chamber.5	-5.71127486629	0.298025277778
2011-04-20 06:59:16.600	Chamber.6	-1.74362934967	0.662081081081
2011-04-20 07:38:08.200	Chamber.2	-4.36673866047	1.2390525
2011-04-20 07:45:05.800	Chamber.3	0.161023891219	1.08897055556
2011-04-20 07:52:15.900	Chamber.5	-6.1389866336	1.03674945946
2011-04-20 07:59:16.500	Chamber.6	-0.435996110647	1.44639567568
2011-04-20 11:34:03.100	Chamber.2	-5.73740830221	3.54019
2011-04-20 11:37:13.900	Chamber.3	-1.7558414394	3.35739333333
2011-04-20 11:40:13.900	Chamber.5	-2.7619113704	3.25782461538
2011-04-20 11:43:13.400	Chamber.6	-2.01517122927	3.61807
2011-04-20 12:38:05.200	Chamber.2	-8.91437742294	3.99565722222
2011-04-20 12:45:16.200	Chamber.3	-2.66146865178	3.59132
2011-04-20 12:52:15.400	Chamber.5	-6.14868269055	2.64599055556
2011-04-20 12:59:16.200	Chamber.6	0.515226850662	3.4023925
2011-04-20 13:37:12.900	Chamber.3	-1.24375711282	3.76345461538
2011-04-20 13:40:13.200	Chamber.5	-3.06184074218	3.30707769231
2011-04-20 14:34:05.700	Chamber.2	-3.53988107187	4.2908
2011-04-20 14:37:14.900	Chamber.3	1.37013010652	4.130555
2011-04-20 14:40:14.800	Chamber.5	-6.17263169066	3.49586416667
2011-04-20 15:34:04.500	Chamber.2	-2.09030792549	3.99456666667
2011-04-20 15:37:14.900	Chamber.3	-1.35053418582	4.02777538462
2011-04-20 15:40:15.300	Chamber.5	-3.53183189398	3.24229083333
2011-04-20 16:34:04.000	Chamber.2	2.21882984544	3.40395
2011-04-20 16:37:14.800	Chamber.3	-3.22934939724	3.31384461538
2011-04-20 16:40:15.400	Chamber.5	-2.53866301201	2.55541666667
2011-04-20 17:34:02.200	Chamber.2	-4.70520408069	2.280685
2011-04-20 17:37:12.900	Chamber.3	-1.19843837148	2.14888076923
2011-04-20 17:40:12.700	Chamber.5	-5.71876889613	1.70432416667
2011-04-20 17:43:12.000	Chamber.6	-1.31509788569	2.26797583333
2011-04-20 18:31:05.200	Chamber.1	0.555630790488	2.22311888889
2011-04-20 18:38:02.600	Chamber.2	-9.41552704837	2.35908638889
2011-04-20 18:45:15.000	Chamber.3	-1.17527840127	2.29298222222
2011-04-20 18:52:13.000	Chamber.5	-7.36500026041	1.68738945946
2011-04-20 18:59:14.600	Chamber.6	-1.77847280842	2.26514277778
2011-04-20 19:31:04.400	Chamber.1	2.71003765389	2.37979666667
2011-04-20 19:34:03.000	Chamber.2	-5.76179555079	2.44292692308
2011-04-20 19:37:14.600	Chamber.3	-4.71680812612	2.49389615385
2011-04-20 19:40:16.000	Chamber.5	-2.5552064554	1.90537666667
2011-04-20 19:43:12.300	Chamber.6	-2.32250868026	2.29201666667
2011-04-20 20:31:05.200	Chamber.1	4.51828094298	1.59676166667
2011-04-20 20:34:02.800	Chamber.2	-3.67297055465	1.63652307692
2011-04-20 20:37:13.600	Chamber.3	-4.73068141793	1.79597769231
2011-04-20 20:40:14.000	Chamber.5	-5.08415783467	1.29928
2011-04-20 20:43:12.700	Chamber.6	-5.51398975241	1.627865
2011-04-20 21:31:03.800	Chamber.1	3.60526548821	1.3531625
2011-04-20 21:34:04.100	Chamber.2	-7.4351320968	1.47070333333
2011-04-20 21:37:15.600	Chamber.3	-2.10211832554	1.47177692308
2011-04-20 21:40:16.100	Chamber.5	-3.70481496899	1.007745
2011-04-20 21:43:12.600	Chamber.6	-3.72477517269	1.38150333333
2011-04-20 22:31:03.200	Chamber.1	-0.270395944958	1.24845083333
2011-04-20 22:34:04.900	Chamber.2	-3.58980433109	1.36030416667
2011-04-20 22:37:15.600	Chamber.3	4.61276068137	1.38164
2011-04-20 22:40:15.600	Chamber.5	-5.38221149106	0.955364166667
2011-04-20 22:43:15.300	Chamber.6	-5.98108173165	1.357475
2011-04-20 23:31:02.700	Chamber.1	-5.71682447087	0.956791666667
2011-04-20 23:34:03.900	Chamber.2	-3.87718413179	0.973781666667
2011-04-20 23:37:14.900	Chamber.3	-1.85623986492	1.05024083333
2011-04-20 23:40:12.800	Chamber.5	-2.80431880151	0.668098461538
2011-04-20 23:43:15.500	Chamber.6	-4.9113822905	0.9992775
2011-04-21 00:38:04.600	Chamber.2	-8.55290118036	0.937445555556
2011-04-21 00:45:14.000	Chamber.3	-1.71435623032	0.933180555556
2011-04-21 00:52:15.700	Chamber.5	-6.41238437952	0.587766666667
2011-04-21 00:59:12.700	Chamber.6	-1.18827499632	0.952060833333
2011-04-21 01:34:02.700	Chamber.2	-7.59915244375	0.63118
2011-04-21 01:37:13.100	Chamber.3	0.118747704142	0.681152307692
2011-04-21 01:40:15.200	Chamber.5	-8.00502409022	0.331061666667
2011-04-21 01:43:14.900	Chamber.6	-0.872271843833	0.63401
2011-04-21 02:31:04.000	Chamber.1	3.20196167234	-0.136043333333
2011-04-21 02:34:02.400	Chamber.2	-5.90399537749	-0.069525
2011-04-21 02:37:13.300	Chamber.3	-3.79253034934	0.0196508333333
2011-04-21 02:40:12.100	Chamber.5	-0.900165633816	-0.208653076923
2011-04-21 02:43:11.800	Chamber.6	-2.63219849544	0.161218333333
2011-04-21 03:31:04.400	Chamber.1	0.0466560690295	0.233391666667
2011-04-21 03:34:03.100	Chamber.2	-7.18963982572	0.257435833333
2011-04-21 03:37:13.200	Chamber.3	-0.0977263060302	0.299610769231
2011-04-21 03:40:12.500	Chamber.5	-2.13305002166	0.00692166666667
2011-04-21 03:43:12.000	Chamber.6	-2.00991831177	0.32965
2011-04-21 04:31:01.900	Chamber.1	1.13395797972	-0.09075
2011-04-21 04:34:04.000	Chamber.2	-8.2515253009	-0.0567975
2011-04-21 04:37:14.700	Chamber.3	3.66371472359	0.0317230769231
2011-04-21 04:40:13.600	Chamber.5	-6.79868049586	-0.236106923077
2011-04-21 04:43:13.500	Chamber.6	-5.07311073838	0.0536175
2011-04-21 05:34:04.600	Chamber.2	-8.52930419709	-0.4007125
2011-04-21 05:37:12.900	Chamber.3	-1.58333451111	-0.279213076923
2011-04-21 05:40:15.500	Chamber.5	-5.11692344608	-0.645556666667
2011-04-21 05:43:14.300	Chamber.6	-1.3439111538	-0.35119
2011-04-21 06:38:04.600	Chamber.2	-9.87416374059	-0.204
2011-04-21 06:45:14.600	Chamber.3	-3.00415596805	-0.0509245945946
2011-04-21 06:52:13.600	Chamber.5	-6.42942712625	-0.255208378378
2011-04-21 06:59:15.200	Chamber.6	-3.08659503503	0.12488
2011-04-21 07:34:03.400	Chamber.2	-5.81422290103	0.837925
2011-04-21 07:37:14.400	Chamber.3	1.80138865569	1.06283692308
2011-04-21 07:40:12.600	Chamber.5	-7.3696558858	0.781269166667
2011-04-21 08:34:03.100	Chamber.2	-11.1173023491	3.96301384615
2011-04-21 08:37:13.400	Chamber.3	-3.14272620441	3.99429153846
2011-04-21 08:40:12.200	Chamber.5	-5.79620937268	3.370305
2011-04-21 08:43:15.000	Chamber.6	0.287178466131	3.95267666667
2011-04-21 09:34:05.900	Chamber.2	-4.86479901594	7.39201666667
2011-04-21 09:37:13.100	Chamber.3	-4.0260268634	6.03541076923
2011-04-21 09:40:13.100	Chamber.5	-6.6190090801	5.35432
2011-04-21 10:34:05.200	Chamber.2	0.0829900291495	11.1199083333
2011-04-21 10:37:13.100	Chamber.3	-2.65585916629	8.45037923077
2011-04-21 10:40:12.000	Chamber.5	-5.92187069236	8.8131025
2011-04-21 10:43:14.300	Chamber.6	-0.417008704514	10.906525
2011-04-21 11:34:04.800	Chamber.2	-4.35521797447	13.31585
2011-04-21 11:37:13.000	Chamber.3	0.530710976225	10.5495076923
2011-04-21 11:40:12.600	Chamber.5	-1.1501767659	9.54277333333
2011-04-21 12:38:03.200	Chamber.2	-3.80280691353e-14	11.6687972222
2011-04-21 12:45:11.900	Chamber.3	-1.07058824032	10.3938337838
2011-04-21 12:52:15.400	Chamber.5	-3.68445295788	9.47312055556
2011-04-21 13:34:02.600	Chamber.2	-4.72678186437	8.67714461538
2011-04-21 13:37:13.800	Chamber.3	-1.13615418755	8.709505
2011-04-21 13:40:13.100	Chamber.5	1.74746805949	7.87812538462
2011-04-21 13:43:15.500	Chamber.6	3.82841742981	8.26395083333
2011-04-21 14:34:04.100	Chamber.2	-5.17488373525	9.23143916667
2011-04-21 14:37:15.200	Chamber.3	-5.65393672849	8.60742230769
2011-04-21 14:40:13.500	Chamber.5	0.289838125766	8.34291615385
2011-04-21 15:34:03.900	Chamber.2	-6.56507191813	9.76270583333
2011-04-21 15:37:13.000	Chamber.3	2.18402662231	9.32318230769
2011-04-21 15:40:14.300	Chamber.5	-3.05005397924	8.7525375
2011-04-21 16:31:02.700	Chamber.1	-4.66566190362	8.40909916667
2011-04-21 16:34:04.800	Chamber.2	-6.80358145531	8.72122916667
2011-04-21 16:37:15.100	Chamber.3	-1.60300499686	8.3694675
2011-04-21 16:40:12.500	Chamber.5	0.410649533991	7.93090076923
2011-04-21 16:43:14.800	Chamber.6	0.720155435407	8.30274416667
2011-04-21 17:31:03.700	Chamber.1	1.04060467	7.20342666667
2011-04-21 17:34:02.100	Chamber.2	-1.74372574644	7.4543325
2011-04-21 17:37:12.500	Chamber.3	-0.322989453076	7.17550538462
2011-04-21 17:40:13.300	Chamber.5	-4.42235289912	6.45821230769
2011-04-21 17:43:14.900	Chamber.6	0.108590974301	7.1991275
2011-04-21 18:31:05.600	Chamber.1	-6.96981566908	5.81062277778
2011-04-21 18:38:05.900	Chamber.2	-5.80834563522	6.06431361111
2011-04-21 18:45:15.000	Chamber.3	-0.306260645451	5.96706594595
2011-04-21 18:52:14.300	Chamber.5	-6.98417595969	5.14678611111
2011-04-21 18:59:12.100	Chamber.6	-11.0733128873	5.4704675
2011-04-21 19:31:05.000	Chamber.1	0.209079905744	5.00604166667
2011-04-21 19:34:02.400	Chamber.2	-5.97749761897	5.18888916667
2011-04-21 19:37:15.300	Chamber.3	1.79102314474	5.18032416667
2011-04-21 19:40:13.300	Chamber.5	-5.92374368503	4.55714461538
2011-04-21 19:43:14.200	Chamber.6	-3.06868981558	4.895495
2011-04-21 20:31:02.500	Chamber.1	-0.094997967459	3.96322916667
2011-04-21 20:34:04.800	Chamber.2	-6.45010987801	4.268035
2011-04-21 20:37:14.200	Chamber.3	-2.10170206253	4.30236076923
2011-04-21 20:40:15.300	Chamber.5	-1.12447831439	3.67280333333
2011-04-21 20:43:12.500	Chamber.6	-2.7899780518	4.0425725
2011-04-21 21:31:02.700	Chamber.1	0.771071308907	3.11068083333
2011-04-21 21:34:03.700	Chamber.2	-3.55532543032	3.26367916667
2011-04-21 21:37:12.400	Chamber.3	-2.61111222759	3.43666153846
2011-04-21 21:40:14.100	Chamber.5	-4.82147746187	2.906695
2011-04-21 21:43:11.500	Chamber.6	-4.26373073804	3.3302825
2011-04-21 22:31:02.400	Chamber.1	-5.59149301684	2.06679
2011-04-21 22:34:03.900	Chamber.2	-9.55613178131	2.27303769231
2011-04-21 22:37:12.400	Chamber.3	-1.37262182476	2.51357769231
2011-04-21 22:40:13.200	Chamber.5	-6.39309674412	1.84170076923
2011-04-21 22:43:13.900	Chamber.6	-12.3287313788	2.0896
2011-04-21 23:31:02.700	Chamber.1	-1.87372477967	0.810941666667
2011-04-21 23:34:04.500	Chamber.2	-7.81744392582	0.897298333333
2011-04-21 23:37:14.000	Chamber.3	0.217590159317	1.21435
2011-04-21 23:40:15.200	Chamber.5	-6.55735218052	0.570294166667
2011-04-21 23:43:12.400	Chamber.6	-2.81314403877	0.81237
2011-04-22 00:38:02.300	Chamber.2	-12.6290733838	-0.241715833333
2011-04-22 00:45:12.300	Chamber.3	-1.64338047763	0.0510127027027
2011-04-22 00:52:15.800	Chamber.5	-20.1007289185	-0.598787777778
2011-04-22 00:59:12.400	Chamber.6	-1.03304517914	-0.419552777778
2011-04-22 01:31:04.100	Chamber.1	5.10164625224	-0.963983333333
2011-04-22 01:34:05.100	Chamber.2	-9.25169453086	-0.971014166667
2011-04-22 01:37:14.400	Chamber.3	-0.750742888	-0.804365384615
2011-04-22 01:40:14.800	Chamber.5	-9.53506621766	-1.09275
2011-04-22 01:43:12.900	Chamber.6	-8.35682769058	-0.717721666667
2011-04-22 02:31:05.000	Chamber.1	-3.09086454467	-1.2923
2011-04-22 02:34:02.300	Chamber.2	-9.09308679972	-1.28525833333
2011-04-22 02:37:12.000	Chamber.3	-3.85832885025	-1.21853076923
2011-04-22 02:40:13.800	Chamber.5	-0.172367798842	-1.54413333333
2011-04-22 02:43:15.500	Chamber.6	-0.75636414511	-0.973919166667
2011-04-22 03:31:04.200	Chamber.1	-0.147415013883	-1.72250833333
2011-04-22 03:34:02.000	Chamber.2	-12.8256097831	-1.72255833333
2011-04-22 03:37:15.600	Chamber.3	1.09921768767	-1.51637692308
2011-04-22 03:40:13.600	Chamber.5	-5.23040021177	-1.8403
2011-04-22 03:43:13.000	Chamber.6	-0.533650429697	-1.18626666667
2011-04-22 04:31:04.900	Chamber.1	-2.44735124089	-1.0149975
2011-04-22 04:34:05.500	Chamber.2	-8.86175329548	-1.02069
2011-04-22 04:37:15.800	Chamber.3	0.0892873862285	-0.916833076923
2011-04-22 04:40:14.100	Chamber.5	-8.96957272317	-1.21739166667
2011-04-22 04:43:12.800	Chamber.6	-6.76473257867	-0.748955
2011-04-22 05:31:05.300	Chamber.1	-1.9081287184	-0.706479166667
2011-04-22 05:34:02.100	Chamber.2	-14.3006541414	-0.6951775
2011-04-22 05:37:12.100	Chamber.3	3.14363571238	-0.600663076923
2011-04-22 05:40:14.800	Chamber.5	-8.42069053989	-0.819735
2011-04-22 05:43:13.100	Chamber.6	-4.09022636426	-0.380960833333
2011-04-22 06:31:03.500	Chamber.1	1.75838506446	0.215025555556
2011-04-22 06:38:03.000	Chamber.2	-10.2604709136	0.313648888889
2011-04-22 06:45:13.100	Chamber.3	-3.23194113702	0.242861944444
2011-04-22 06:52:12.200	Chamber.5	-8.02407347268	0.102414054054
2011-04-22 07:31:05.100	Chamber.1	1.66462651584	0.760113333333
2011-04-22 07:34:02.900	Chamber.2	-6.46629714372	0.79408
2011-04-22 07:37:14.100	Chamber.3	-2.70308679028	0.628965384615
2011-04-22 07:40:15.600	Chamber.5	-4.98158537519	0.481169166667
2011-04-22 07:43:14.300	Chamber.6	-8.37369521812	0.721861666667
2011-04-22 08:34:04.600	Chamber.2	-12.6768890457	1.347705
2011-04-22 08:37:12.000	Chamber.3	4.35799389197	1.21053692308
2011-04-22 08:40:14.700	Chamber.5	-10.771798437	0.99934
2011-04-22 08:43:13.600	Chamber.6	-6.29253129108	1.17348916667
2011-04-22 09:34:03.700	Chamber.2	-6.43242147129	3.13100666667
2011-04-22 09:37:14.500	Chamber.3	-5.8619827904	2.75468923077
2011-04-22 09:40:12.000	Chamber.5	-5.03118620517	2.90241
2011-04-22 09:43:15.600	Chamber.6	-2.56147343773	3.41156
2011-04-22 10:34:02.100	Chamber.2	-5.80899340134	5.49221166667
2011-04-22 10:37:15.400	Chamber.3	-2.5855270677	4.87488692308
2011-04-22 10:40:13.400	Chamber.5	-2.58879704912	5.18766538462
2011-04-22 11:31:05.100	Chamber.1	1.40176193652	9.78188083333
2011-04-22 11:34:05.700	Chamber.2	-6.24929388746	9.37863666667
2011-04-22 11:37:14.200	Chamber.3	3.08068101386	7.60496
2011-04-22 11:40:23.800	Chamber.5	-4.83612636477	7.75693384615
2011-04-22 12:31:04.300	Chamber.1	0.10359394804	8.85483138889
2011-04-22 12:38:01.600	Chamber.2	-5.45149624258	9.33226611111
2011-04-22 12:45:14.000	Chamber.3	-2.03228980684	7.90531891892
2011-04-22 13:34:03.600	Chamber.2	-3.79794776498	6.7799575
2011-04-22 13:38:03.100	Chamber.5	-2.65699112486	6.27364833333
2011-04-22 13:41:12.200	Chamber.6	-1.63796330791	7.16696615385
2011-04-22 14:34:04.000	Chamber.2	-7.78291013626	7.39136083333
2011-04-22 14:37:12.800	Chamber.3	0.629108708705	6.83456384615
2011-04-22 14:40:12.900	Chamber.5	-7.5966335671	6.79671769231
2011-04-22 15:31:01.800	Chamber.1	8.050695822	8.00416166667
2011-04-22 15:34:02.200	Chamber.2	-3.80468168892	8.10787583333
2011-04-22 15:37:15.000	Chamber.3	-0.0571151482249	7.568615
2011-04-22 15:40:12.000	Chamber.5	-6.07658384431	7.64360692308
2011-04-22 15:43:12.300	Chamber.6	-6.51537884336	8.20406333333
2011-04-22 16:34:01.900	Chamber.2	-4.25158567587	7.38414416667
2011-04-22 16:37:15.300	Chamber.3	-0.188544203535	7.27422692308
2011-04-22 16:40:13.100	Chamber.5	3.14821323155	6.75056769231
2011-04-22 16:43:13.300	Chamber.6	0.627556542762	7.6054975
2011-04-22 17:34:04.800	Chamber.2	-2.02052944884	8.19995166667
2011-04-22 17:37:13.700	Chamber.3	-5.45918072736	7.93322416667
2011-04-22 17:40:15.600	Chamber.5	-12.6021208787	7.5376675
2011-04-22 18:31:01.900	Chamber.1	4.02345585978	6.39771861111
2011-04-22 18:38:02.100	Chamber.2	-6.80946437639	6.31022916667
2011-04-22 18:45:13.800	Chamber.3	-0.919924993843	6.21096918919
2011-04-22 18:52:13.000	Chamber.5	-6.77204463154	5.22469378378
2011-04-22 18:59:14.300	Chamber.6	-3.08846811167	5.30687638889
2011-04-22 19:31:03.800	Chamber.1	3.01619117717	4.17027583333
2011-04-22 19:34:05.600	Chamber.2	-10.0675145739	4.33331833333
2011-04-22 19:37:12.400	Chamber.3	6.42770214043	4.57187769231
2011-04-22 19:40:14.600	Chamber.5	0.12237052206	3.8500525
2011-04-22 19:43:15.200	Chamber.6	-12.6666156464	4.0384775
2011-04-22 20:31:01.900	Chamber.1	-2.86806925776	2.35004
2011-04-22 20:34:04.400	Chamber.2	-13.7640993962	2.53847083333
2011-04-22 20:37:14.900	Chamber.3	-0.639604478219	2.844405
2011-04-22 20:40:11.900	Chamber.5	-7.38753854037	2.11075083333
2011-04-22 20:43:12.800	Chamber.6	-16.3541002248	2.33593166667
2011-04-22 21:31:03.200	Chamber.1	7.5435818107	1.00486333333
2011-04-22 21:34:05.400	Chamber.2	-16.7627079459	1.18609583333
2011-04-22 21:37:15.300	Chamber.3	1.64876090426	1.48203666667
2011-04-22 21:40:12.700	Chamber.5	9.17651691909	0.85765
2011-04-22 21:43:15.300	Chamber.6	0.675597839228	1.03463333333
2011-04-22 22:31:04.700	Chamber.1	-25.9749448968	-0.0185558333333
2011-04-22 22:34:03.100	Chamber.2	-3.34957767899	0.121571666667
2011-04-22 22:37:13.300	Chamber.3	5.38265769836	0.461618461538
2011-04-22 22:40:14.600	Chamber.5	0.795825092002	-0.0907483333333
2011-04-22 22:43:11.800	Chamber.6	-1.43763182906	0.113078333333
2011-04-22 23:31:04.500	Chamber.1	-1.01508006664	-0.525275833333
2011-04-22 23:34:02.000	Chamber.2	-4.61067739775	-0.583308333333
2011-04-22 23:37:14.600	Chamber.3	-2.12916536763	-0.341281666667
2011-04-22 23:40:15.600	Chamber.5	-12.8107224483	-0.782855
2011-04-22 23:43:12.700	Chamber.6	-3.45276357484	-0.593221666667
2011-04-23 00:38:01.700	Chamber.2	-14.8773261345	-0.839000833333
2011-04-23 00:45:14.400	Chamber.3	-0.715622965307	-0.916671891892
2011-04-23 00:52:13.700	Chamber.5	-13.2041246526	-1.09337459459
2011-04-23 00:59:15.300	Chamber.6	-1.84326766743	-0.655511944444
2011-04-23 01:31:04.500	Chamber.1	-2.35654229855	-1.13525
2011-04-23 01:34:03.100	Chamber.2	-9.58931421884	-1.10695
2011-04-23 01:37:13.500	Chamber.3	-1.42515499824	-0.868456153846
2011-04-23 01:40:14.100	Chamber.5	-6.1417865015	-1.21028333333
2011-04-23 01:43:15.300	Chamber.6	-4.7055893831	-0.727693333333
2011-04-23 02:31:03.300	Chamber.1	-0.72384254809	-1.2669
2011-04-23 02:34:04.500	Chamber.2	-16.4099104447	-1.25984166667
2011-04-23 02:37:14.000	Chamber.3	6.86187547103	-0.967765384615
2011-04-23 02:40:14.800	Chamber.5	-4.74475410278	-1.36594166667
2011-04-23 02:43:13.700	Chamber.6	-1.99667226504	-0.932916666667
2011-04-23 03:31:02.700	Chamber.1	1.16013695589	-1.55276666667
2011-04-23 03:34:05.400	Chamber.2	-13.252514578	-1.58675
2011-04-23 03:37:14.900	Chamber.3	-7.13000042785	-1.3662
2011-04-23 03:40:12.500	Chamber.5	-8.82414945116	-1.76220833333
2011-04-23 03:43:14.300	Chamber.6	-2.29665161702	-1.2174
2011-04-23 04:31:02.200	Chamber.1	1.19944803594	-1.8259
2011-04-23 04:34:03.600	Chamber.2	-10.3944179973	-1.87118333333
2011-04-23 04:37:13.000	Chamber.3	3.18317015408	-1.6523
2011-04-23 04:40:15.500	Chamber.5	-7.4100077747	-2.06788333333
2011-04-23 04:43:13.300	Chamber.6	-0.998475713012	-1.50894166667
2011-04-23 05:31:03.000	Chamber.1	0.573341791836	-1.82869166667
2011-04-23 05:34:05.200	Chamber.2	-7.4838742381	-1.82164166667
2011-04-23 05:37:14.900	Chamber.3	-1.23907106632	-1.58306923077
2011-04-23 05:40:13.600	Chamber.5	-9.38441534489	-2.00695
2011-04-23 05:43:12.200	Chamber.6	-2.49333222005	-1.52025833333
2011-04-23 06:38:04.400	Chamber.2	-10.9591871023	-1.12165
2011-04-23 06:45:13.000	Chamber.3	-0.859820808571	-0.894694054054
2011-04-23 06:52:13.200	Chamber.5	-9.31866670863	-1.13934324324
2011-04-23 07:31:04.700	Chamber.1	0.360751255271	-0.229481666667
2011-04-23 07:34:02.200	Chamber.2	-13.0726490288	-0.1615475
2011-04-23 07:37:15.500	Chamber.3	-0.460196727194	-0.157733846154
2011-04-23 07:40:14.100	Chamber.5	-9.53085058628	-0.3342525
2011-04-23 07:43:12.000	Chamber.6	-3.07969922997	0.0267475
2011-04-23 08:31:05.000	Chamber.1	2.78161792525	1.88878916667
2011-04-23 08:34:04.000	Chamber.2	-6.09108888572	1.84469692308
2011-04-23 08:37:14.300	Chamber.3	-4.73742339979	2.16768384615
2011-04-23 08:40:12.700	Chamber.5	-9.70533193692	2.00290769231
2011-04-23 08:43:15.200	Chamber.6	-6.10603042079	2.35348
2011-04-23 09:34:05.300	Chamber.2	-10.460765344	7.21699666667
2011-04-23 09:37:14.400	Chamber.3	3.41499342987	6.01126416667
2011-04-23 09:40:11.900	Chamber.5	-6.89654232654	5.61059615385
2011-04-23 09:43:14.000	Chamber.6	-1.08820687674	7.51894583333
2011-04-23 10:34:02.800	Chamber.2	-5.06299832624	11.4217416667
2011-04-23 10:37:12.500	Chamber.3	1.26581424334	8.55433461538
2011-04-23 10:40:13.900	Chamber.5	-6.26390996577	9.09184083333
2011-04-23 11:31:05.300	Chamber.1	9.62276979572	14.4200333333
2011-04-23 11:34:03.000	Chamber.2	-1.78621777194	13.7674083333
2011-04-23 11:37:11.700	Chamber.3	-0.69787808514	10.2725384615
2011-04-23 11:40:12.600	Chamber.5	0.777668473654	10.2083938462
2011-04-23 11:43:13.500	Chamber.6	0.153526754678	10.82985
2011-04-23 12:31:03.100	Chamber.1	2.10252791739	12.174075
2011-04-23 12:38:04.500	Chamber.2	-2.80104219784	12.3819138889
2011-04-23 12:45:14.000	Chamber.3	-8.97228192424	11.5860702703
2011-04-23 12:52:15.400	Chamber.5	-1.52580424717	11.5976194444
2011-04-23 12:59:13.600	Chamber.6	-1.49681111535	11.6489361111
2011-04-23 13:34:04.800	Chamber.2	-0.281717261519	13.849525
2011-04-23 13:37:13.800	Chamber.3	-0.606246218541	12.4643
2011-04-23 13:40:12.500	Chamber.5	-1.74484694006	12.0746923077
2011-04-23 13:43:14.200	Chamber.6	3.62963465455	11.9133916667
2011-04-23 14:31:05.000	Chamber.1	0.686488230832	12.7214666667
2011-04-23 14:34:02.100	Chamber.2	-1.75759147203	12.5694
2011-04-23 14:37:15.300	Chamber.3	-5.36280987361	12.82495
2011-04-23 14:40:12.300	Chamber.5	3.22350796939	12.2923666667
2011-04-23 14:43:14.900	Chamber.6	6.90475850385	12.245725
2011-04-23 15:31:04.200	Chamber.1	1.05410650471	11.8021083333
2011-04-23 15:34:01.800	Chamber.2	-1.66620991635	12.2197333333
2011-04-23 15:37:15.000	Chamber.3	0.396930378244	12.4737583333
2011-04-23 15:40:13.000	Chamber.5	3.97359113762	12.1164230769
2011-04-23 15:43:13.600	Chamber.6	-2.34974625891	11.9073166667
2011-04-23 16:31:04.600	Chamber.1	-1.67930527225	10.3363333333
2011-04-23 16:34:02.400	Chamber.2	0.363706952741	10.8958416667
2011-04-23 16:37:12.000	Chamber.3	3.71137345641	11.2169769231
2011-04-23 16:40:14.600	Chamber.5	3.60783659126	10.4785083333
2011-04-23 16:43:15.300	Chamber.6	3.52516319846	10.4231083333
2011-04-23 17:31:02.300	Chamber.1	7.4683985533	9.11685916667
2011-04-23 17:34:03.800	Chamber.2	-4.50488360419	9.74335692308
2011-04-23 17:37:13.100	Chamber.3	-2.00602086783	9.94490230769
2011-04-23 17:40:14.700	Chamber.5	-6.35088615069	8.95900416667
2011-04-23 17:43:15.900	Chamber.6	-0.340456371808	9.09942416667
2011-04-23 18:31:04.100	Chamber.1	2.07129829483	7.31983944444
2011-04-23 18:38:03.000	Chamber.2	-5.6071705278	7.65267805556
2011-04-23 18:45:13.200	Chamber.3	-0.275871607082	7.74354972973
2011-04-23 18:52:15.300	Chamber.5	-1.45785154212	6.766395
2011-04-23 19:34:02.700	Chamber.2	-5.53510241739	5.88199833333
2011-04-23 19:37:12.400	Chamber.3	-0.451464884957	6.18568615385
2011-04-23 19:40:13.300	Chamber.5	-9.43658135623	5.43329846154
2011-04-23 19:43:14.200	Chamber.6	-5.8259812415	5.53034833333
2011-04-23 20:31:03.000	Chamber.1	0.996047647155	3.59056666667
2011-04-23 20:34:04.400	Chamber.2	-8.10706748904	3.822865
2011-04-23 20:37:14.600	Chamber.3	0.866296153457	4.18966692308
2011-04-23 20:40:13.400	Chamber.5	-8.21420418929	3.37752384615
2011-04-23 20:43:14.700	Chamber.6	-6.19940267362	3.5892375
2011-04-23 21:31:04.100	Chamber.1	-3.70478287528	2.18851416667
2011-04-23 21:34:01.800	Chamber.2	-12.0937889611	2.46177083333
2011-04-23 21:37:15.500	Chamber.3	-5.68431448244	2.80629769231
2011-04-23 21:40:13.500	Chamber.5	-2.19875708193	2.14223538462
2011-04-23 21:43:15.200	Chamber.6	-2.96020149953	2.35841666667
2011-04-23 22:31:03.100	Chamber.1	-1.96802048569	1.28377666667
2011-04-23 22:34:04.500	Chamber.2	-11.2680801834	1.484835
2011-04-23 22:37:14.200	Chamber.3	0.617819718251	1.69268076923
2011-04-23 22:40:11.900	Chamber.5	-6.85905205591	1.1365025
2011-04-23 22:43:14.000	Chamber.6	-0.136509893798	1.31773666667
2011-04-23 23:34:05.600	Chamber.2	-13.4390083978	0.452781666667
2011-04-23 23:37:14.400	Chamber.3	2.03322033774	0.7373125
2011-04-23 23:40:12.300	Chamber.5	-3.60970218271	0.18243
2011-04-23 23:43:13.900	Chamber.6	-2.3184374354	0.36077
2011-04-24 00:38:02.700	Chamber.2	-18.2667420461	-0.659209166667
2011-04-24 00:45:15.500	Chamber.3	-1.61270591104	-0.368567837838
2011-04-24 00:52:12.100	Chamber.5	-12.6541716095	-0.941337567568
2011-04-24 00:59:14.800	Chamber.6	-2.14555116044	-0.875228055556
2011-04-24 01:31:02.300	Chamber.1	2.18131899712	-1.19174166667
2011-04-24 01:34:03.400	Chamber.2	-8.92027753101	-1.20798461538
2011-04-24 01:37:13.000	Chamber.3	-1.81336064717	-1.17273076923
2011-04-24 01:40:14.700	Chamber.5	-9.35378588013	-1.43088333333
2011-04-24 01:43:13.100	Chamber.6	-1.19267022484	-0.886143333333
2011-04-24 02:31:02.800	Chamber.1	-3.13894069429	-1.66296666667
2011-04-24 02:34:04.500	Chamber.2	-13.0368060637	-1.67426666667
2011-04-24 02:37:13.900	Chamber.3	1.04921464052	-1.38957692308
2011-04-24 02:40:14.900	Chamber.5	-5.57852453412	-1.87940833333
2011-04-24 02:43:12.300	Chamber.6	-0.536882682261	-1.21870833333
2011-04-24 03:31:04.300	Chamber.1	-0.434159970606	-2.12279166667
2011-04-24 03:34:02.000	Chamber.2	-10.4021048189	-2.12706666667
2011-04-24 03:37:12.500	Chamber.3	-0.927151518286	-1.82977692308
2011-04-24 03:40:14.100	Chamber.5	-10.1919033846	-2.32506666667
2011-04-24 03:43:13.100	Chamber.6	-4.71264131792	-1.63468333333
2011-04-24 04:31:05.400	Chamber.1	2.66097132437	-2.19918333333
2011-04-24 04:34:05.100	Chamber.2	-10.9090966053	-2.19496666667
2011-04-24 04:37:14.600	Chamber.3	-2.67589404379	-1.86243846154
2011-04-24 04:40:15.500	Chamber.5	-3.53793244663	-2.38875
2011-04-24 04:43:13.600	Chamber.6	-4.97166975735	-1.74935
2011-04-24 05:31:05.200	Chamber.1	3.32494067791	-2.1511
2011-04-24 05:34:04.000	Chamber.2	-11.4666729147	-2.11295
2011-04-24 05:37:14.400	Chamber.3	-0.813155817799	-1.84979166667
2011-04-24 05:40:12.200	Chamber.5	-10.9375740651	-2.28946923077
2011-04-24 05:43:15.300	Chamber.6	-3.91673403221	-1.7324
2011-04-24 06:38:04.200	Chamber.2	-14.1676894239	-1.21742777778
2011-04-24 06:45:13.800	Chamber.3	-1.25704877947	-0.957126216216
2011-04-24 06:52:14.300	Chamber.5	-8.72330624367	-1.11836111111
2011-04-24 06:59:13.700	Chamber.6	-1.32955485178	-0.581466666667
2011-04-24 07:34:03.700	Chamber.2	-8.10664173526	0.324035
2011-04-24 07:37:14.500	Chamber.3	1.54981714673	0.3962275
2011-04-24 07:40:12.600	Chamber.5	0.873279562054	0.310091538462
2011-04-24 07:43:12.700	Chamber.6	-6.71700492207	0.677986666667
2011-04-24 08:31:02.400	Chamber.1	-1.57105027008	3.59006166667
2011-04-24 08:34:04.900	Chamber.2	-10.0959407934	3.8353325
2011-04-24 08:37:14.800	Chamber.3	-5.74812714349	4.02997230769
2011-04-24 08:40:12.900	Chamber.5	-5.53327611108	4.02070153846
2011-04-24 08:43:12.700	Chamber.6	-4.40146842818	4.22502916667
2011-04-24 09:34:02.300	Chamber.2	-6.21908368184	9.13902083333
2011-04-24 09:37:12.000	Chamber.3	1.40742479354	7.54884230769
2011-04-24 09:40:13.700	Chamber.5	-7.5629987752	7.52783923077
2011-04-24 10:34:03.300	Chamber.2	-0.745364669756	14.1326333333
2011-04-24 10:37:14.200	Chamber.3	2.04348541188	10.7799583333
2011-04-24 10:40:12.700	Chamber.5	-4.11290716193	11.6262769231
2011-04-24 11:31:02.900	Chamber.1	1.85658096984	16.4840916667
2011-04-24 11:34:04.700	Chamber.2	-0.810602822483	15.8401333333
2011-04-24 11:37:15.500	Chamber.3	-6.95083085686	12.7191461538
2011-04-24 11:40:14.800	Chamber.5	-1.04792419088	12.6949583333
2011-04-24 11:43:14.500	Chamber.6	1.00415264861	12.6836
2011-04-24 12:31:04.200	Chamber.1	17.0927879003	14.0344972222
2011-04-24 12:38:03.300	Chamber.2	-5.99385457706	14.2499333333
2011-04-24 12:45:12.800	Chamber.3	-1.57196252491	13.8821864865
2011-04-24 12:52:14.000	Chamber.5	-1.61519580466	14.1693555556
2011-04-24 12:59:15.400	Chamber.6	-0.936095933828	13.3344777778
2011-04-24 13:31:02.500	Chamber.1	8.08895557674	14.5534083333
2011-04-24 13:34:04.100	Chamber.2	0.586820166241	16.0257083333
2011-04-24 13:37:14.900	Chamber.3	5.31075407328	15.0139461538
2011-04-24 13:40:14.300	Chamber.5	-0.0215280157295	14.7336583333
2011-04-24 13:43:12.900	Chamber.6	2.63445215265	14.1918333333
2011-04-24 14:34:02.200	Chamber.2	-1.69524752339	15.0249333333
2011-04-24 14:37:13.500	Chamber.3	2.60767088552	15.2036692308
2011-04-24 14:40:16.000	Chamber.5	3.82638013283	14.7388416667
2011-04-24 14:43:15.600	Chamber.6	3.58728377951	13.8506
2011-04-24 15:34:02.800	Chamber.2	1.27915486448	14.6340333333
2011-04-24 15:37:13.000	Chamber.3	-3.7572200797	14.6372
2011-04-24 15:40:13.100	Chamber.5	-0.46631091761	14.0983416667
2011-04-24 15:43:14.100	Chamber.6	4.18537372776	14.310175
2011-04-24 16:31:05.900	Chamber.1	2.90118888151	13.3562583333
2011-04-24 16:34:04.400	Chamber.2	1.84122984727	13.877875
2011-04-24 16:37:14.600	Chamber.3	4.55529373508	13.8337
2011-04-24 16:40:13.100	Chamber.5	0.276071986817	12.9762538462
2011-04-24 16:43:11.800	Chamber.6	0.828984201884	13.068875
2011-04-24 17:31:02.300	Chamber.1	6.72064008801	11.6537416667
2011-04-24 17:34:03.800	Chamber.2	-2.61396817245	12.283675
2011-04-24 17:37:13.700	Chamber.3	5.37521120777	12.5044076923
2011-04-24 17:40:15.500	Chamber.5	-1.43138911248	11.6831
2011-04-24 17:43:14.600	Chamber.6	-1.26307831051	11.6603833333
2011-04-24 18:31:05.400	Chamber.1	1.83570116323	9.78372277778
2011-04-24 18:38:04.000	Chamber.2	-7.15206466471	10.2216502778
2011-04-24 18:45:14.700	Chamber.3	-1.88449040794	10.4034833333
2011-04-24 18:52:12.000	Chamber.5	-2.50896945749	9.55438648649
2011-04-24 18:59:13.000	Chamber.6	-0.712630940173	9.32176472222
2011-04-24 19:31:02.500	Chamber.1	1.07130023968	8.20691666667
2011-04-24 19:34:04.500	Chamber.2	-5.04775534449	8.57271833333
2011-04-24 19:37:13.800	Chamber.3	-5.63580952221	8.82193076923
2011-04-24 19:40:14.900	Chamber.5	-8.16991646423	8.1146775
2011-04-24 19:43:12.000	Chamber.6	-3.47297621385	8.16025166667
2011-04-24 20:34:02.500	Chamber.2	-6.72352748908	6.520965
2011-04-24 20:37:12.700	Chamber.3	-0.976142084038	6.83105384615
2011-04-24 20:40:14.800	Chamber.5	-10.3618186899	6.08155166667
2011-04-24 20:43:12.000	Chamber.6	0.643543151167	6.197865
2011-04-24 21:31:03.400	Chamber.1	6.00859160702	4.71399416667
2011-04-24 21:34:04.900	Chamber.2	-11.4132598127	5.0442225
2011-04-24 21:37:15.100	Chamber.3	-2.74542990295	5.27137307692
2011-04-24 21:40:13.600	Chamber.5	-7.68248954701	4.63819307692
2011-04-24 21:43:14.600	Chamber.6	-7.79106433636	4.81190166667
2011-04-24 22:31:02.700	Chamber.1	3.30630299521	3.38532
2011-04-24 22:34:02.000	Chamber.2	-9.15177120998	3.6501725
2011-04-24 22:37:14.800	Chamber.3	-4.71136306015	3.90213076923
2011-04-24 22:40:11.700	Chamber.5	-9.69179847717	3.32872416667
2011-04-24 22:43:13.400	Chamber.6	-7.06763758317	3.569445
2011-04-24 23:31:02.700	Chamber.1	-4.63810577449	2.29192916667
2011-04-24 23:34:02.300	Chamber.2	-12.9601902617	2.54408333333
2011-04-24 23:37:15.200	Chamber.3	-3.0051207532	2.82215384615
2011-04-24 23:40:13.600	Chamber.5	-8.3495361388	2.19137166667
2011-04-24 23:43:15.100	Chamber.6	-7.22723793057	2.39949083333
2011-04-25 00:38:04.200	Chamber.2	-15.2374625841	1.21961277778
2011-04-25 00:45:15.400	Chamber.3	-0.478576960563	1.43204459459
2011-04-25 00:52:14.400	Chamber.5	-8.43679334239	0.843507777778
2011-04-25 00:59:14.400	Chamber.6	-2.2542755154	0.940704722222
2011-04-25 01:31:04.200	Chamber.1	0.991877388161	0.323986666667
2011-04-25 01:34:05.700	Chamber.2	-12.5048236737	0.486783333333
2011-04-25 01:37:11.900	Chamber.3	0.514128374801	0.698143076923
2011-04-25 01:40:14.400	Chamber.5	-8.26660086902	0.22913
2011-04-25 01:43:15.600	Chamber.6	-3.99409516444	0.400415833333
2011-04-25 02:31:05.300	Chamber.1	4.9819996292	-0.397853333333
2011-04-25 02:34:03.600	Chamber.2	-12.0987453357	-0.286051666667
2011-04-25 02:37:14.700	Chamber.3	-0.241866051926	-0.0597176923077
2011-04-25 02:40:11.900	Chamber.5	-2.64456790099	-0.506848333333
2011-04-25 02:43:13.600	Chamber.6	-4.21121545556	-0.3412625
2011-04-25 03:31:04.500	Chamber.1	-3.91247765331	-0.8210475
2011-04-25 03:34:02.400	Chamber.2	-14.4724590764	-0.911613333333
2011-04-25 03:37:12.900	Chamber.3	-1.07920893517	-0.667219230769
2011-04-25 03:40:14.400	Chamber.5	-9.76642394065	-1.16914166667
2011-04-25 03:43:11.900	Chamber.6	-6.47032887404	-0.935695
2011-04-25 04:31:01.800	Chamber.1	-1.24136750907	-1.28663333333
2011-04-25 04:34:03.700	Chamber.2	-14.8044632913	-1.292275
2011-04-25 04:37:14.000	Chamber.3	-3.11666436421	-1.29653333333
2011-04-25 04:40:12.300	Chamber.5	-5.8376779676	-1.58286153846
2011-04-25 04:43:14.100	Chamber.6	0.866014299539	-0.941339166667
2011-04-25 05:31:02.300	Chamber.1	-1.24475435932	-1.27535
2011-04-25 05:34:05.300	Chamber.2	-13.2954129759	-1.28100833333
2011-04-25 05:37:15.900	Chamber.3	-2.27388077717	-1.09181769231
2011-04-25 05:40:14.700	Chamber.5	-9.39905465331	-1.460675
2011-04-25 05:43:15.600	Chamber.6	-1.94066489538	-0.8182525
2011-04-25 06:31:04.400	Chamber.1	-0.245184429538	-0.389406944444
2011-04-25 06:38:03.800	Chamber.2	-17.3208791014	-0.211073888889
2011-04-25 06:45:12.000	Chamber.3	-0.896918443294	-0.0487566666667
2011-04-25 06:52:13.700	Chamber.5	-10.1815869511	-0.137469444444
2011-04-25 06:59:13.100	Chamber.6	-3.39274694307	0.261693611111
2011-04-25 07:31:03.100	Chamber.1	-5.72282178196	1.42128666667
2011-04-25 07:34:02.100	Chamber.2	-15.1124935636	1.78387583333
2011-04-25 07:37:15.600	Chamber.3	-8.09461177599	1.81576384615
2011-04-25 07:40:14.700	Chamber.5	-0.886410877939	1.66772416667
2011-04-25 07:43:12.200	Chamber.6	-4.65951919609	1.83198666667
2011-04-25 08:31:04.000	Chamber.1	0.84028341949	5.6749625
2011-04-25 08:34:02.900	Chamber.2	-11.8134817241	6.07778666667
2011-04-25 08:37:13.400	Chamber.3	-3.76316280288	6.14177076923
2011-04-25 08:40:13.900	Chamber.5	-6.81499264678	6.13708916667
2011-04-25 08:43:12.400	Chamber.6	-6.26277999963	6.67759083333
2011-04-25 09:31:02.000	Chamber.1	1.44166338225	11.8176666667
2011-04-25 09:34:03.600	Chamber.2	-6.19153509645	12.8345416667
2011-04-25 09:37:13.400	Chamber.3	-4.87024788886	11.0790846154
2011-04-25 09:40:14.900	Chamber.5	-7.99643028396	11.0177916667
2011-04-25 10:31:04.700	Chamber.1	2.26945402105	14.6103833333
2011-04-25 10:34:03.200	Chamber.2	0.0682787920919	18.3035833333
2011-04-25 10:37:11.900	Chamber.3	-8.98743252641	14.6445
2011-04-25 10:40:12.100	Chamber.5	-4.22709613208	15.7951692308
2011-04-25 11:31:03.200	Chamber.1	1.35378137534	20.0288
2011-04-25 11:34:03.900	Chamber.2	-1.69776543764	19.6851461538
2011-04-25 11:37:12.800	Chamber.3	-7.60480332117	16.4383769231
2011-04-25 11:40:15.100	Chamber.5	-6.11503058015	16.7592166667
2011-04-25 11:43:13.300	Chamber.6	4.78588057681	16.4499833333
2011-04-25 12:31:04.700	Chamber.1	-0.579862103198	17.5229722222
2011-04-25 12:38:04.800	Chamber.2	-3.75206527206	17.8917138889
2011-04-25 12:45:15.100	Chamber.3	-2.11585608406	17.0202027027
2011-04-25 12:52:14.100	Chamber.5	-2.60700363827	17.6377583333
2011-04-25 12:59:12.400	Chamber.6	9.1360219556	16.7036361111
2011-04-25 13:31:02.400	Chamber.1	10.7206764524	17.7378833333
2011-04-25 13:34:04.400	Chamber.2	3.05385981366	19.2192083333
2011-04-25 13:37:13.800	Chamber.3	-2.47445030686	18.0219615385
2011-04-25 13:40:15.500	Chamber.5	-1.08363985728	18.12725
2011-04-25 13:43:13.900	Chamber.6	2.23093563979	17.0580666667
2011-04-25 14:31:03.300	Chamber.1	-0.916376540436	17.210925
2011-04-25 14:34:04.200	Chamber.2	-0.585142403188	17.4283833333
2011-04-25 14:37:13.900	Chamber.3	-12.7109251728	17.177925
2011-04-25 14:40:12.900	Chamber.5	0.307394964207	17.3842307692
2011-04-25 14:43:15.900	Chamber.6	7.68834809139	16.7699166667
2011-04-25 15:34:05.100	Chamber.2	1.60419570984	17.4058166667
2011-04-25 15:37:12.300	Chamber.3	-5.75220105977	17.6011153846
2011-04-25 15:40:14.100	Chamber.5	-1.63289836053	17.45115
2011-04-25 15:43:15.500	Chamber.6	0.967511159936	16.9536083333
2011-04-25 16:34:04.600	Chamber.2	-5.94150476944	17.0791083333
2011-04-25 16:37:13.700	Chamber.3	-2.2171920248	17.1274769231
2011-04-25 16:40:16.300	Chamber.5	-3.53620770164	16.772325
2011-04-25 16:43:13.900	Chamber.6	-21.9275238695	16.2219916667
2011-04-25 17:31:02.900	Chamber.1	-0.265949218678	14.5591333333
2011-04-25 17:34:04.500	Chamber.2	-0.437877471567	14.9624083333
2011-04-25 17:37:13.200	Chamber.3	0.797239418796	15.0289230769
2011-04-25 17:40:14.400	Chamber.5	-7.10881376977	14.465175
2011-04-25 17:43:13.400	Chamber.6	2.21717972371	14.4056583333
2011-04-25 18:38:04.000	Chamber.2	-9.24340054076	12.6044583333
2011-04-25 18:45:14.900	Chamber.3	-0.842419072314	12.6394361111
2011-04-25 18:52:13.200	Chamber.5	-9.11633451553	12.0120324324
2011-04-25 18:59:14.200	Chamber.6	0.546293957091	11.6569861111
2011-04-25 19:31:03.800	Chamber.1	7.56145486354	10.5863916667
2011-04-25 19:34:04.900	Chamber.2	-9.07175251833	10.999175
2011-04-25 19:37:14.600	Chamber.3	-0.366594485826	11.2126384615
2011-04-25 19:40:15.700	Chamber.5	-9.41856335353	10.5652833333
2011-04-25 19:43:13.700	Chamber.6	1.53322436075	10.57355
2011-04-25 20:31:02.500	Chamber.1	1.72066750561	8.2013425
2011-04-25 20:34:04.100	Chamber.2	-19.4947736859	8.62702166667
2011-04-25 20:37:15.300	Chamber.3	0.927808678081	8.96452615385
2011-04-25 20:40:13.100	Chamber.5	-11.7496571761	8.28629230769
2011-04-25 20:43:14.600	Chamber.6	3.16150160032	8.2041825
2011-04-25 21:31:04.700	Chamber.1	-3.58036674902	6.24052916667
2011-04-25 21:34:02.200	Chamber.2	-8.57128478291	6.59636833333
2011-04-25 21:37:12.800	Chamber.3	-0.829823216315	6.91859923077
2011-04-25 21:40:13.800	Chamber.5	-5.36217041514	6.25317916667
2011-04-25 21:43:12.300	Chamber.6	-2.68447878697	6.29986916667
2011-04-25 22:31:05.300	Chamber.1	1.08929385074	4.47320166667
2011-04-25 22:34:02.600	Chamber.2	-10.4815101581	4.82324333333
2011-04-25 22:37:13.100	Chamber.3	-1.64953023818	5.09221538462
2011-04-25 22:40:15.800	Chamber.5	-5.7594182841	4.49159083333
2011-04-25 22:43:14.300	Chamber.6	-10.7941948633	4.61921666667
2011-04-25 23:31:02.800	Chamber.1	0.275512738809	3.04396416667
2011-04-25 23:34:05.200	Chamber.2	-13.6357429363	3.352865
2011-04-25 23:37:14.800	Chamber.3	-2.70979570233	3.61447076923
2011-04-25 23:40:13.000	Chamber.5	-5.3632897781	3.04952846154
2011-04-25 23:43:14.900	Chamber.6	-5.16151832321	3.19839666667
2011-04-26 00:38:02.700	Chamber.2	-17.5581879461	1.98180972222
2011-04-26 00:45:14.000	Chamber.3	-1.78234973207	2.30464972973
2011-04-26 00:52:14.600	Chamber.5	14.757241235	1.6354125
2011-04-26 01:31:03.400	Chamber.1	6.40706168356	0.8420825
2011-04-26 01:34:01.900	Chamber.2	-18.1767501137	1.01907333333
2011-04-26 01:37:15.800	Chamber.3	-2.27037339669	1.29794692308
2011-04-26 01:40:14.400	Chamber.5	2.19607396749	0.737306666667
2011-04-26 01:43:12.200	Chamber.6	-0.0662972898938	0.973765
2011-04-26 02:31:03.200	Chamber.1	2.16718378312	-0.0256266666667
2011-04-26 02:34:03.100	Chamber.2	-16.5648951365	0.111446153846
2011-04-26 02:37:13.500	Chamber.3	2.25255474815	0.402826153846
2011-04-26 02:40:12.200	Chamber.5	-5.06362272947	-0.179935
2011-04-26 02:43:13.300	Chamber.6	-2.66443502565	0.0847825
2011-04-26 03:31:02.700	Chamber.1	-1.75372497061	-0.825280833333
2011-04-26 03:34:05.300	Chamber.2	-16.3224701738	-0.703596666667
2011-04-26 03:37:14.800	Chamber.3	0.46715370999	-0.459510769231
2011-04-26 03:40:14.000	Chamber.5	-10.7928478377	-1.0305025
2011-04-26 03:43:12.200	Chamber.6	-6.26648408919	-0.7290425
2011-04-26 04:31:04.100	Chamber.1	1.16198652268	-1.21306666667
2011-04-26 04:34:02.600	Chamber.2	-12.6433493129	-1.34890833333
2011-04-26 04:37:12.300	Chamber.3	-2.01882495559	-1.17149230769
2011-04-26 04:40:14.800	Chamber.5	-11.246615789	-1.662975
2011-04-26 04:43:12.400	Chamber.6	-2.73542423219	-1.15929166667
2011-04-26 05:31:01.900	Chamber.1	-4.38643963709	-1.252725
2011-04-26 05:34:04.900	Chamber.2	-16.8934570641	-1.22724166667
2011-04-26 05:37:15.400	Chamber.3	-2.75030784709	-1.06828692308
2011-04-26 05:40:13.700	Chamber.5	-9.04335021734	-1.446525
2011-04-26 05:43:12.500	Chamber.6	-2.05718801665	-0.743215
2011-04-26 06:38:04.900	Chamber.2	-21.694408257	-0.107854594595
2011-04-26 06:45:12.900	Chamber.3	-2.36087663727	0.12445027027
2011-04-26 06:52:15.400	Chamber.5	-15.1881996864	0.0777008333333
2011-04-26 06:59:12.400	Chamber.6	-5.52550164589	0.437282222222
2011-04-26 07:34:05.700	Chamber.2	-14.0559392228	2.23286307692
2011-04-26 07:37:13.200	Chamber.3	1.1768438727	2.59239538462
2011-04-26 07:40:11.800	Chamber.5	-7.65544041094	2.43819666667
2011-04-26 07:43:13.800	Chamber.6	-7.62918776569	2.48215666667
2011-04-26 08:34:04.500	Chamber.2	-12.9009792231	7.80366916667
2011-04-26 08:37:15.200	Chamber.3	-6.90571933886	8.10292153846
2011-04-26 08:40:13.600	Chamber.5	-8.74419649148	7.97246083333
2011-04-26 08:43:12.200	Chamber.6	-1.49086931888	8.51028333333
2011-04-26 09:31:01.900	Chamber.1	-2.63146780909	12.825125
2011-04-26 09:34:03.500	Chamber.2	-9.8062946392	14.2123333333
2011-04-26 09:37:13.500	Chamber.3	-7.55855065515	12.2990615385
2011-04-26 09:40:14.300	Chamber.5	-10.0966611363	12.26245
2011-04-26 10:31:04.500	Chamber.1	-3.12842020995	14.9828083333
2011-04-26 10:34:03.300	Chamber.2	-9.87251036793	18.6020083333
2011-04-26 10:37:15.200	Chamber.3	-9.14209389137	15.0937384615
2011-04-26 10:40:13.500	Chamber.5	-7.00380787582	16.2946538462
2011-04-26 10:43:14.900	Chamber.6	-3.73834155301	17.149125
2011-04-26 11:34:01.500	Chamber.2	-10.2034734803	19.5007666667
2011-04-26 11:37:13.700	Chamber.3	-2.4489945015	16.4683666667
2011-04-26 11:40:15.000	Chamber.5	-9.49439494005	16.9059916667
2011-04-26 11:43:12.500	Chamber.6	-1.56004941881	16.3900666667
2011-04-26 12:31:03.200	Chamber.1	-0.272952455628	17.5306777778
2011-04-26 12:38:02.700	Chamber.2	-12.8333325018	17.9932916667
2011-04-26 12:45:12.200	Chamber.3	-1.96917377814	17.2406
2011-04-26 12:52:12.900	Chamber.5	-7.69238039628	17.6908567568
2011-04-26 12:59:12.000	Chamber.6	-0.494668189908	16.6050388889
2011-04-26 13:31:02.500	Chamber.1	-0.136522534318	17.9536916667
2011-04-26 13:34:05.400	Chamber.2	-7.09942094396	18.9755583333
2011-04-26 13:37:14.700	Chamber.3	4.72476785726	17.98385
2011-04-26 13:40:12.500	Chamber.5	-4.05457637924	17.9636692308
2011-04-26 13:43:14.900	Chamber.6	0.752141227723	16.814625
2011-04-26 14:31:05.100	Chamber.1	4.55228279789	17.446975
2011-04-26 14:34:04.000	Chamber.2	-12.4738795201	17.7272416667
2011-04-26 14:37:12.600	Chamber.3	0.189703976576	17.7275
2011-04-26 14:40:14.400	Chamber.5	-2.01481233103	17.6978416667
2011-04-26 14:43:12.700	Chamber.6	0.121549949791	16.6933
2011-04-26 15:31:01.800	Chamber.1	0.105345687887	16.759425
2011-04-26 15:34:03.700	Chamber.2	-9.08170818263	16.9942384615
2011-04-26 15:37:12.700	Chamber.3	-0.112376568714	16.9916384615
2011-04-26 15:40:14.000	Chamber.5	-1.34118110208	17.1164666667
2011-04-26 15:43:11.700	Chamber.6	0.810208656618	16.5317666667
2011-04-26 16:31:02.700	Chamber.1	2.33802073334	15.966725
2011-04-26 16:34:03.600	Chamber.2	-7.50686140677	16.2252583333
2011-04-26 16:37:13.100	Chamber.3	-9.79790250033	16.4523307692
2011-04-26 16:40:14.300	Chamber.5	-0.715025042525	15.868875
2011-04-26 16:43:15.800	Chamber.6	0.245130703879	15.4168666667
2011-04-26 17:31:03.700	Chamber.1	0.321442490915	14.84705
2011-04-26 17:34:05.400	Chamber.2	-15.7037283316	15.0734166667
2011-04-26 17:37:14.800	Chamber.3	-1.3268528032	15.5053416667
2011-04-26 17:40:15.600	Chamber.5	-4.72619323256	14.6094615385
2011-04-26 17:43:13.900	Chamber.6	-2.28705188853	14.4152083333
2011-04-26 18:31:02.800	Chamber.1	2.78551739492	12.4452472222
2011-04-26 18:38:05.600	Chamber.2	-11.1869915354	12.8052055556
2011-04-26 18:45:13.700	Chamber.3	-1.13749618551	12.8223027027
2011-04-26 18:52:15.900	Chamber.5	-8.57083541137	12.2255944444
2011-04-26 18:59:13.600	Chamber.6	-5.23425834676	11.8776583333
2011-04-26 19:31:04.200	Chamber.1	14.6490964341	10.5869083333
2011-04-26 19:34:04.600	Chamber.2	-13.3633418655	10.8594416667
2011-04-26 19:37:13.600	Chamber.3	-3.0148092084	11.1882153846
2011-04-26 19:40:11.800	Chamber.5	-9.42874546479	10.5973230769
2011-04-26 19:43:13.400	Chamber.6	-6.52538730294	10.4620333333
2011-04-26 20:34:03.800	Chamber.2	-8.87875130962	8.7838525
2011-04-26 20:37:14.000	Chamber.3	5.33225182983	9.13722153846
2011-04-26 20:40:12.000	Chamber.5	-11.0394875044	8.56597153846
2011-04-26 20:43:14.600	Chamber.6	-7.26379905889	8.48036166667
2011-04-26 21:31:02.900	Chamber.1	-1.91843549159	7.31494583333
2011-04-26 21:34:04.300	Chamber.2	-16.8986744414	7.68807923077
2011-04-26 21:37:14.400	Chamber.3	-2.96838693455	8.0154725
2011-04-26 21:40:12.000	Chamber.5	-10.8618815047	7.63837666667
2011-04-26 21:43:14.200	Chamber.6	-2.80899638183	7.7249425
2011-04-26 22:31:02.500	Chamber.1	-1.48972365787	8.0724875
2011-04-26 22:34:04.300	Chamber.2	-14.569631457	8.40864833333
2011-04-26 22:37:12.500	Chamber.3	-4.76275677582	8.86429230769
2011-04-26 22:40:14.700	Chamber.5	-9.08755084715	8.43308083333
2011-04-26 22:43:13.100	Chamber.6	2.0360875179	8.75087333333
2011-04-26 23:34:04.400	Chamber.2	-16.9722193023	7.70517333333
2011-04-26 23:37:14.000	Chamber.3	0.44106930216	7.837035
2011-04-26 23:40:12.100	Chamber.5	-4.45822364384	7.45124416667
2011-04-26 23:43:14.100	Chamber.6	-1.96183597638	7.49526333333
2011-04-27 00:31:03.800	Chamber.1	0.503597951828	6.97763027778
2011-04-27 00:38:04.200	Chamber.2	-17.7796971665	7.03473805556
2011-04-27 00:45:14.900	Chamber.3	-1.3465415667	7.24620216216
2011-04-27 00:52:13.100	Chamber.5	-6.97533723128	6.67639162162
2011-04-27 00:59:13.200	Chamber.6	-8.1434428261	6.69505333333
2011-04-27 01:31:03.900	Chamber.1	1.77141143057	7.04198
2011-04-27 01:34:05.500	Chamber.2	-11.6193215802	7.10423083333
2011-04-27 01:37:15.000	Chamber.3	1.13520785279	7.27124923077
2011-04-27 01:40:13.800	Chamber.5	-10.1252575889	6.73981833333
2011-04-27 01:43:15.500	Chamber.6	-11.3638848524	6.8378475
2011-04-27 02:31:02.000	Chamber.1	1.93532722105	5.54337666667
2011-04-27 02:34:04.200	Chamber.2	-19.1440504347	5.775775
2011-04-27 02:37:14.900	Chamber.3	-2.28590822319	5.96887846154
2011-04-27 02:40:14.400	Chamber.5	-9.76990652004	5.47112083333
2011-04-27 02:43:14.300	Chamber.6	-2.26221286231	5.61418083333
2011-04-27 03:31:03.300	Chamber.1	-0.725536708702	3.97190583333
2011-04-27 03:34:02.700	Chamber.2	-18.7654570704	4.18578916667
2011-04-27 03:37:15.500	Chamber.3	1.24255060793	4.51026692308
2011-04-27 03:40:14.000	Chamber.5	-7.16096775517	3.8599475
2011-04-27 03:43:12.200	Chamber.6	-0.4922130462	4.00600333333
2011-04-27 04:31:05.200	Chamber.1	-0.574222458316	2.52272583333
2011-04-27 04:34:04.400	Chamber.2	-16.0210371352	2.74371916667
2011-04-27 04:37:15.400	Chamber.3	-0.0673886394678	3.11368769231
2011-04-27 04:40:13.900	Chamber.5	-4.59966783589	2.50292833333
2011-04-27 04:43:12.900	Chamber.6	-6.0560314578	2.71548583333
2011-04-27 05:34:05.100	Chamber.2	-14.5998749469	2.38124166667
2011-04-27 05:37:15.700	Chamber.3	-2.5727325464	2.69538461538
2011-04-27 05:40:13.800	Chamber.5	-11.8688967697	2.28075
2011-04-27 05:43:15.800	Chamber.6	-7.48602454948	2.63336583333
2011-04-27 06:38:02.000	Chamber.2	-19.9609438218	4.20334675676
2011-04-27 06:45:13.300	Chamber.3	-2.40222680696	4.48730135135
2011-04-27 06:52:12.100	Chamber.5	-6.68508990071	5.15764864865
2011-04-27 06:59:13.800	Chamber.6	-10.0343727505	5.80451138889
2011-04-27 07:34:04.500	Chamber.2	-16.7673948643	7.42411
2011-04-27 07:37:14.000	Chamber.3	-5.69284133875	7.16209
2011-04-27 07:40:12.600	Chamber.5	-11.9430488062	7.49381583333
2011-04-27 08:34:03.900	Chamber.2	-20.0309114924	9.18038583333
2011-04-27 08:37:14.700	Chamber.3	-3.64540008298	8.77231076923
2011-04-27 08:40:13.400	Chamber.5	-11.1945218024	9.00663384615
2011-04-27 09:34:05.100	Chamber.2	-12.9899734773	11.7589083333
2011-04-27 09:37:15.100	Chamber.3	1.43698972015	10.2256083333
2011-04-27 09:40:12.300	Chamber.5	-7.76275865364	10.5167153846
2011-04-27 10:34:04.000	Chamber.2	-7.91711907208	15.4106416667
2011-04-27 10:37:14.100	Chamber.3	-9.42021570375	12.1852
2011-04-27 10:40:15.100	Chamber.5	-16.011295911	13.6240916667
2011-04-27 10:43:12.300	Chamber.6	-2.53271742745	14.1081416667
2011-04-27 11:34:03.800	Chamber.2	-6.97057613288	15.740725
2011-04-27 11:37:14.600	Chamber.3	0.422111931882	12.9711307692
2011-04-27 11:40:12.100	Chamber.5	-9.04778488849	13.618575
2011-04-27 12:31:02.900	Chamber.1	-0.645817609101	14.5688555556
2011-04-27 12:38:01.900	Chamber.2	-16.3307513719	14.7282
2011-04-27 12:45:13.800	Chamber.3	-0.726445839424	13.7217416667
2011-04-27 12:52:13.400	Chamber.5	-12.572313761	14.7941135135
2011-04-27 13:31:02.700	Chamber.1	-3.0058482913	14.6833333333
2011-04-27 13:34:05.700	Chamber.2	-10.1156261135	15.7669416667
2011-04-27 13:37:12.200	Chamber.3	-1.07494077129	14.3574
2011-04-27 13:40:13.900	Chamber.5	-4.99148019008	14.54285
2011-04-27 14:34:03.400	Chamber.2	-21.0387640245	14.4833916667
2011-04-27 14:37:14.100	Chamber.3	4.83072903846	14.3147
2011-04-27 14:40:12.700	Chamber.5	-2.43610611669	14.4827076923
[truncated: 59,117 more rows]
